# Supplementary material for: Lysophosphatidic Acid Promotes the Expansion of Cancer Stem Cells via TRPC3 Channels in Triple-Negative Breast Cancer
Source: MDPI journal article supplement (doi:10.3390/ijms23041967), 2022-02-10
Supplement: s1 [file s1]

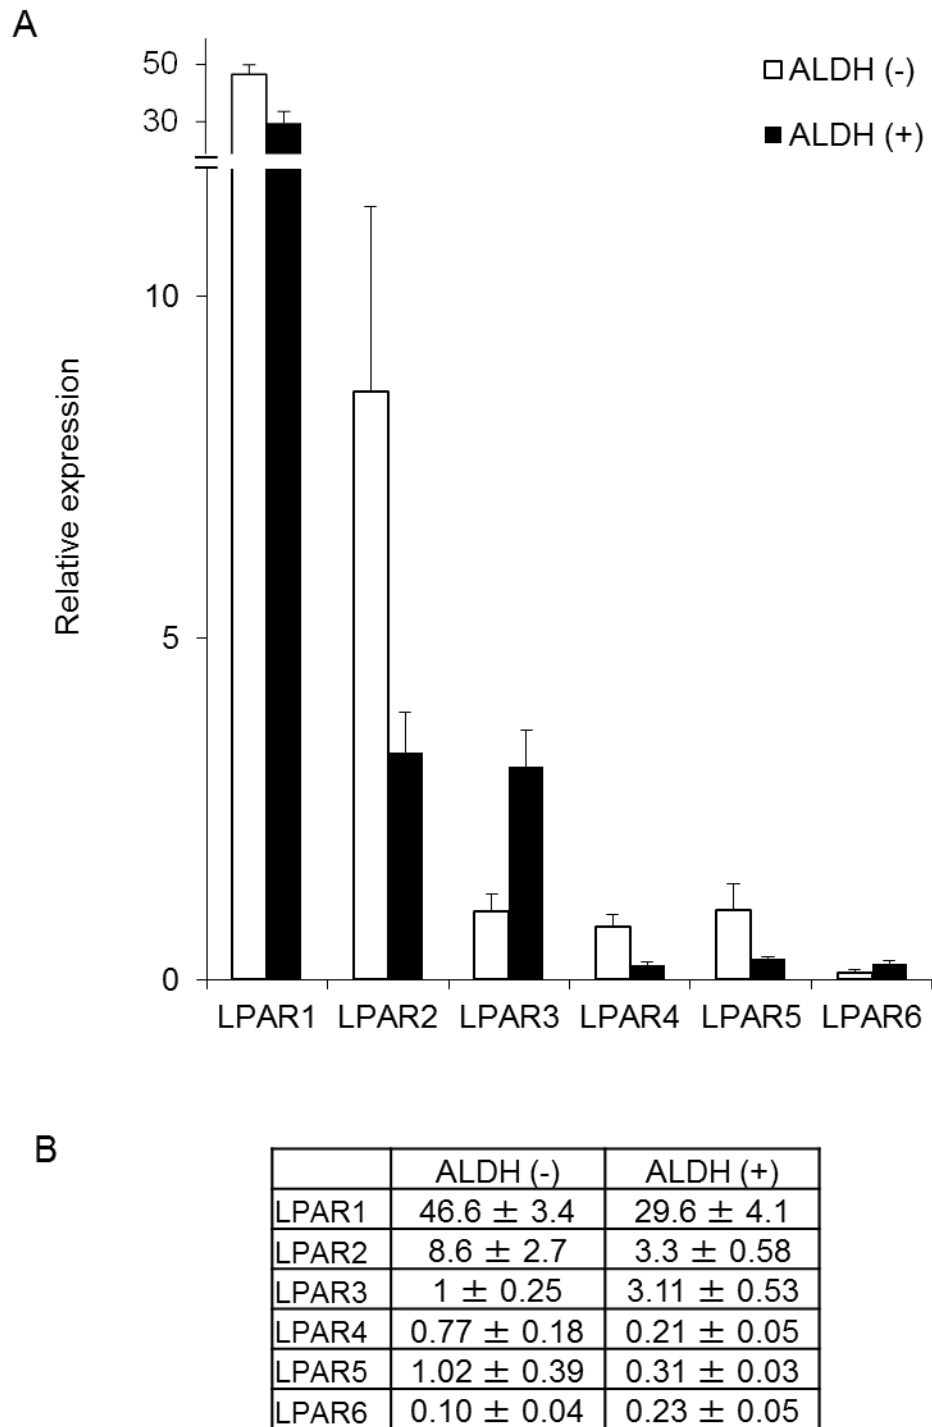

**Figure S1. LPAR expression in ALDH-negative and -positive cells of MDA-MB-231 cells.** Expression level of LPAR expression showing relative to LPAR3 of ALDH-negative cells. Data represent the mean ± s.d. (n=3).

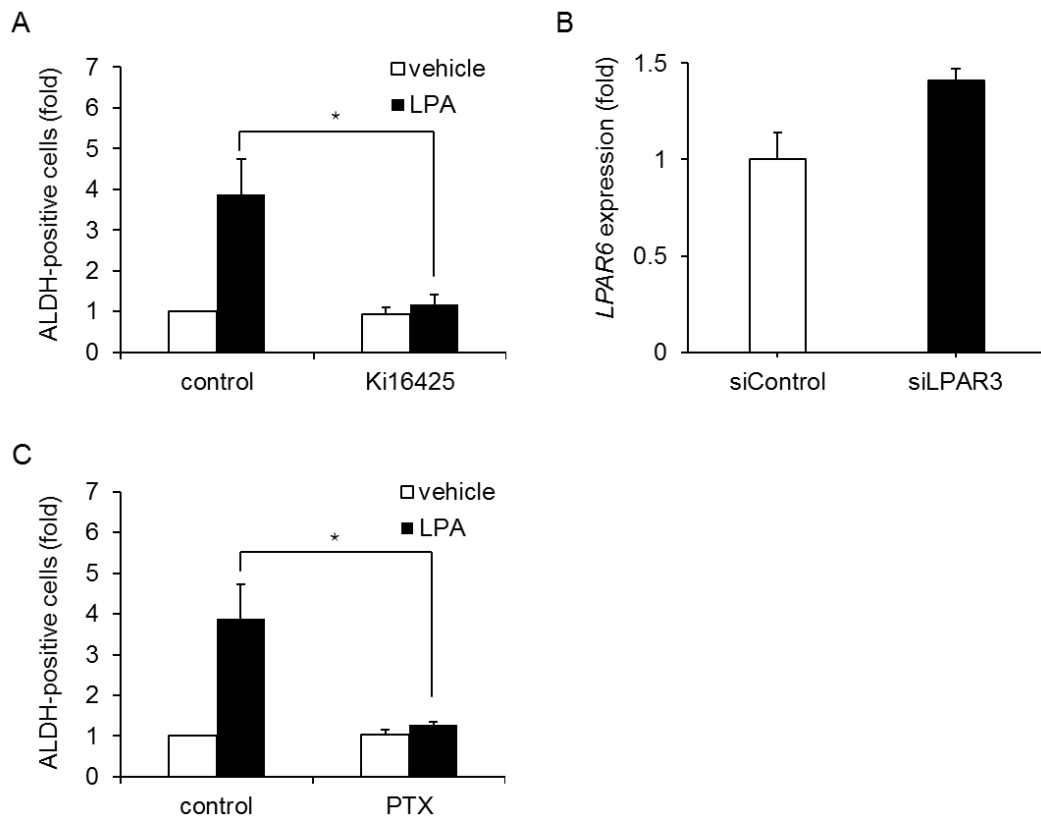

**Figure S2. LPA increases ALDH-positive cells via LPAR3/Gi signaling in HCC1806 cells. (A)**

Effects of LPAR1/3 antagonists (Ki16425, 10  $\mu$ M) on the number of ALDH-positive cells in HCC1806 after LPA treatment. Data represent the mean  $\pm$  s.d. (n=3). **(B)** Effect of LPAR3 siRNA on LPAR6 expression. Data represent the mean  $\pm$  s.d. (n=3). **(C)** Effect of PTX (100 ng/mL) on the number of ALDH-positive cells in HCC1806 cells after LPA treatment. Data represent the mean  $\pm$  s.d. (n=3). \* $p$  < 0.05.

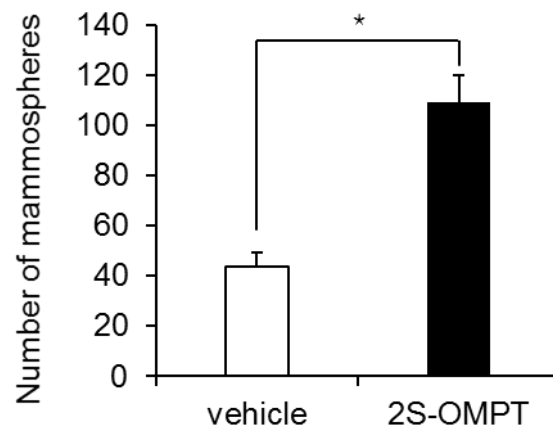

**Figure S3. 2S-OMPT increases mammosphere formation in MDA-MB-231 cells.** Effects of 3  $\mu$ M 2S-OMPT on the mammosphere-forming efficiency of MDA-MB-231 cells. The number of mammospheres was counted using a microscope. Data represent the mean  $\pm$  s.d. (n=3). \* $p$  < 0.05.

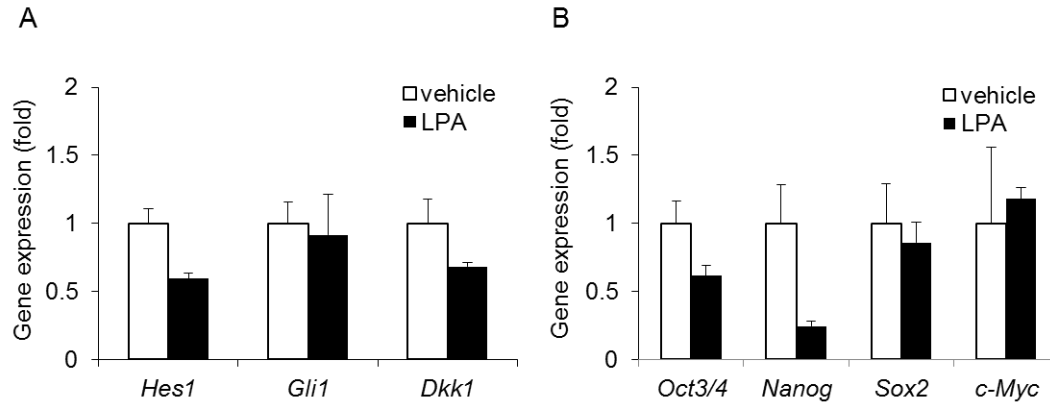

**Figure S4. Effect of LPA treatment on stem cell pathway in MDA-MB-231 cells.** (A) After stimulation with LPA (10  $\mu$ M, 24 h), expression of target gene of Notch (*Hes1*), Hedgehog (*Gli1*), Wnt (*Dkk1*) were analyzed by qPCR. (B) After stimulation with LPA (10  $\mu$ M, 24 h), expression of self-renewal-related transcription factors were analyzed by qPCR. Data represent mean  $\pm$  s.d. (n=3). \* $p < 0.05$ .

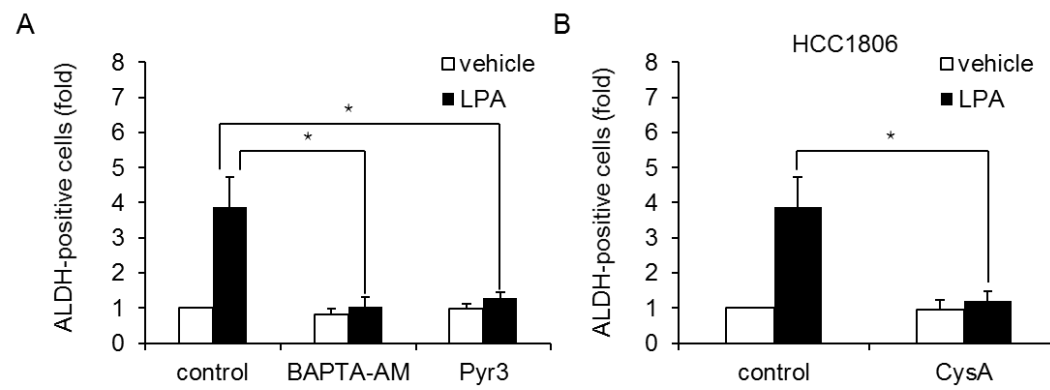

**Figure S5. LPA-induced  $\text{Ca}^{2+}$ /calcineurin/NFAT signaling in HCC1806 cells.** (A) Effects of BAPTA-AM (1  $\mu\text{M}$ ) and Pyr3 (1  $\mu\text{M}$ ) on the LPA-induced increase in ALDH-positive cells. Data represent the mean  $\pm$  s.d. (n=3). (B) Effect of CysA (10  $\mu\text{M}$ ) on LPA-induced increases in ALDH-positive cells. Data represent the mean  $\pm$  s.d. (n=3). \* $p < 0.05$ .

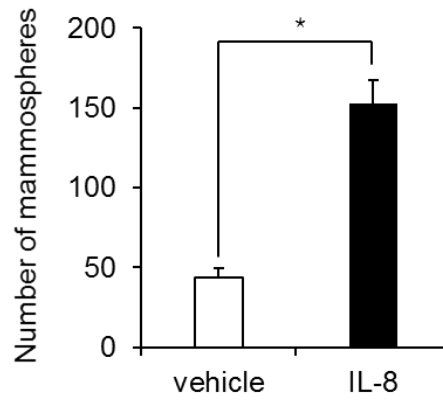

**Figure S6. IL-8 increases mammosphere formation in MDA-MB-231 cells.** Effects of 100 ng/ml IL-8 on the mammosphere-forming efficiency of MDA-MB-231 cells. The number of mammospheres was counted using a microscope. Data represent the mean  $\pm$  s.d. (n=3). \* $p < 0.05$ .

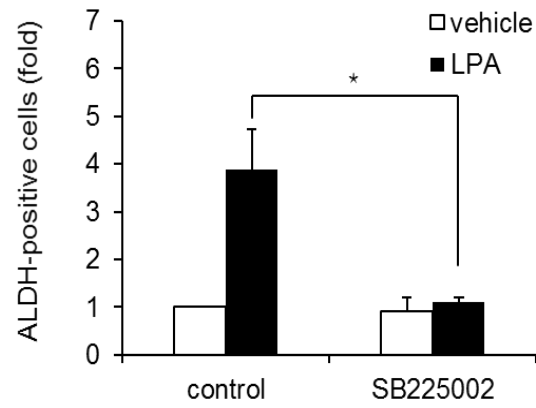

**Figure S7. Role of IL-8 on LPA-induced increases in ALDH-positive cells in HCC1806 cells.**

Effect of the IL-8 receptor antagonist SB225002 (1  $\mu$ M) on the LPA-induced proportion of ALDH-positive cells in HCC1806 cells. Data represent the mean  $\pm$  s.d. (n=3). \* $p$  < 0.05.

**Supplementary Table S2:** Primer sequences used for qPCR analysis.

|        | forward                 | reverse                   |
|--------|-------------------------|---------------------------|
| LPAR1  | GCTGGTGATGGGACTTGGAAT   | CAACCCAGCAAAGAAGTCTGC     |
| LPAR2  | GCATGGCAGAGCATGTCA      | TGCAGGACTCACAGCCTAAA      |
| LPAR3  | AGGACACCCATGAAGCTAATGAA | GCCGTCGAGGAGCAGAAC        |
| LPAR4  | CCAGACACGTTTGGAGAAGC    | TCTGGATCCTAGTCCTCAGTGG    |
| LPAR5  | CGCCATCTTCCAGATGAAC     | TAGCGGTCCACGTTGATG        |
| LPAR6  | TCTGGCAATTGTCTACCCATT   | TCAAAGCAGGCTTCTGAGG       |
| ATX    | CTTTCGGCCCTGAGGAGAGTA   | AGCAACTGGTCTTTCCTGTCT     |
| LPP1   | CAAGACTCTTACGCCCCACACT  | GAGAAAGGCCACATAAATGGA     |
| LPP2   | CCGAGGCCAGGTGTCTTT      | ACACCATGCAGTACATCCCAA     |
| LPP3   | TGGTGGCCTGCTGCATAGT     | GGAGAGCGTCGTCTTAGTCTTGA   |
| Hes1   | AGCGGGCGCAGATGAC        | CGTTCATGCACTCGCTGAA       |
| Gli1   | GTGCAAGTCAAGCCAGAACA    | ATAGGGGCCTGACTGGAGAT      |
| Dkk1   | GGGCGGGAATAAGTACCAG     | CATAGCGTGACGCATGCAG       |
| Oct3/4 | ACATCAAAGCTCTGCAGAAAGAA | CTGAATACCTTCCCAAATAGAACCC |
| Nanog  | CAGAAGGCCTCAGCACCTAC    | ATTGTTCCAGGTCTGGTTGC      |
| Sox2   | AACCCCAAGATGCACAACCTC   | GCTTAGCCTCGTCGATGAAC      |
| c-Myc  | CACGAACTTTGCCCATAGC     | GCAAGGAGAGCCTTTCAGAG      |
| TRPC3  | CAAGAATGACTATCGGAAGC    | GCCACAACTTTTTTGACTTC      |
| IL-8   | TTGGCAGCCTTCCTGATTTC    | AACTTCTCCACAACCCTCTG      |
| CXCR2  | AGGTCAGAAGTTTCATCGTCAAG | AAAGCTGTCACTCTCCATGTAA    |
