# Supplementary material for: Lysophosphatidic Acid Promotes the Expansion of Cancer Stem Cells via TRPC3 Channels in Triple-Negative Breast Cancer
Source: Int J Mol Sci. 2022 Feb 10;23(4):1967. doi: 10.3390/ijms23041967 (PMC8877950; doi:10.3390/ijms23041967)
Supplement: Supplementary file 1 [file ijms-23-01967-s001.zip › ijms-1542151 suppl conversion/ijms-1542151 Table S1.xlsx]

## Sheet: Sheet1
Supplementary Table S1. RNA-seq analysis of LPA-treated MDA-MB-231 cells.
gene_short_name	Control (FPKM)	LPA treatment (FPKM)	ΔLPA (fold change)
MIR34A	0.270555	13.8706	51.2672
GABRE,MIR224	6.6562	133.11	19.9979
RNVU1-19	1.00545	18.903	18.8005
MIR221,MIR222	1.69227	22.2687	13.1591
LOC101929977	0.208159	2.08802	10.0309
LINC00239	0.163771	1.53492	9.37236
LOC101928158	0.115174	1.04756	9.09546
LOC102060414	0.128728	1.07243	8.33098
LOC101930071	0.606321	4.71646	7.77882
LOC284454,MIR23A,MIR24-2,MIR27A	5.82945	39.0015	6.69043
DIAPH3-AS1	0.196274	1.2788	6.51538
TNFAIP8L3	0.121138	0.756916	6.24838
LOC101928429	0.126918	0.79301	6.24821
IL8	236.239	1403.04	5.93907
LOC100505940	0.756155	4.47038	5.91199
KCTD4	0.112929	0.666409	5.90113
HNRNPA1P33	0.63547	3.52939	5.55398
IFITM4P	0.912485	4.95771	5.4332
LOC101929897	0.135083	0.7061	5.22716
SIX3-AS1	0.111436	0.580249	5.20702
CAHM	0.105419	0.548903	5.20687
LOC102723679	0.123445	0.642762	5.20687
LOC102724914	0.873473	4.54805	5.20686
LOC102724805	0.117613	0.612394	5.20686
LOC100507336	0.120737	0.622148	5.15292
LOC101927137	45.1145	223.374	4.95127
LOC101927279	0.306729	1.47175	4.79821
LPL	0.1018	0.487653	4.7903
HOXD4,MIR10B	20.3081	96.4614	4.7499
LOC101927057	0.217508	1.01928	4.68617
BOC,LOC102723687	0.232768	1.08282	4.65193
LINC00628	0.198911	0.897611	4.51263
CCL2	0.395348	1.78405	4.51261
LOC102723543	0.199591	0.884635	4.43224
LOC283887	0.184657	0.817015	4.4245
AC096559.1	0.342295	1.46353	4.27564
FBLN1	0.771562	3.26935	4.23731
LOC648044	0.299784	1.24875	4.1655
LOC728715	0.146166	0.608854	4.1655
ARHGAP26-IT1	0.62086	2.58619	4.1655
PGM5-AS1	0.215619	0.89816	4.1655
LOC100996693	0.117613	0.489916	4.16549
LOC101929548	0.417521	1.73918	4.16549
LOC102724907	0.100713	0.419519	4.16549
FLJ32756	0.140777	0.586405	4.16549
MIR320A	97.8529	407.605	4.16549
LOC102724384	0.153662	0.640076	4.16548
ZRANB2-AS2	0.124082	0.516861	4.16548
LOC100506253	0.401013	1.67041	4.16548
TRNAS10	0.2631	1.09587	4.16522
MIR424,MIR503,MIR503HG	2.76082	11.3624	4.11559
THAP7-AS1	0.228113	0.920435	4.035
BSPRY	0.115948	0.460265	3.96958
MIR137,MIR137HG,MIR2682	0.2941	1.1538	3.92316
CALHM3	0.199041	0.780321	3.9204
ICA1L	0.238925	0.933113	3.90546
LOC102724689	1.45192	5.66998	3.90516
RP11-266L9.2	0.153069	0.584472	3.81836
LOC641367	0.173762	0.663485	3.81835
RP11-367N14.2	0.57655	2.19019	3.79879
CCDC169,CCDC169-SOHLH2,SOHLH2	0.768415	2.84168	3.69811
KREMEN2	0.162926	0.601337	3.69086
NOX5,SPESP1	0.7166	2.64303	3.68829
LOC100506317	0.162298	0.592391	3.65002
C6orf118	0.10657	0.388432	3.64485
IFNK	0.153795	0.560553	3.64481
LOC101929882	0.374234	1.36401	3.64481
MTMR8	0.176093	0.641824	3.6448
PIN4P1	0.133393	0.48619	3.64479
LOC101929824	0.350604	1.26789	3.6163
PSG6	0.235031	0.832165	3.54066
C19orf48,SNORD88C	46.4466	163.435	3.51877
MPP4	0.169869	0.597416	3.51692
KALRN	0.110327	0.386844	3.50634
RCOR2	0.12778	0.438033	3.42802
LOC101928274	0.591596	2.01211	3.40116
LOC101928504	0.279595	0.94628	3.38447
CXCR5	0.107798	0.364837	3.38445
OAZ3	1.44204	4.61412	3.19972
TBC1D30	0.25686	0.815649	3.17546
LOC102723863	0.643067	2.00942	3.12474
LOC100506454	0.164879	0.51513	3.12429
LINC00211	0.158416	0.494919	3.12417
TNKS2-AS1	0.410021	1.28096	3.12413
LOC101927420	0.344422	1.07602	3.12413
LOC102724243	0.118384	0.369847	3.12413
OSGEPL1-AS1	0.101136	0.315962	3.12413
LOC102724245	0.476408	1.48836	3.12413
LOC102724668	0.473681	1.47984	3.12413
LOC101927000	0.115913	0.362127	3.12413
SNORD121A	34.4602	107.658	3.12413
RAB41	0.165995	0.518589	3.12412
LOC102724009	0.189077	0.5907	3.12412
DOCK9-AS1	0.378103	1.18124	3.12412
C11orf42	0.30661	0.957887	3.12412
AC073283.4	0.100015	0.312459	3.12412
HIST1H2AA	0.241596	0.754775	3.12412
LOC102723554	0.303546	0.948314	3.12412
LOC101928044	0.364109	1.13752	3.12412
LOC102723317	0.261942	0.818338	3.12412
MTOR-AS1	0.143008	0.446774	3.12412
WNT10B	0.16651	0.520197	3.12412
SNORD65	72.4259	226.267	3.12412
LOC439951	0.30088	0.939984	3.12412
FAM215A	0.124725	0.389655	3.12411
RP5-1024G6.5	0.14736	0.460369	3.12411
LOC101928678	0.245708	0.767619	3.12411
LOC102724679	0.508942	1.58999	3.12411
LOC102723444	0.434312	1.35676	3.12393
MEIG1	0.228591	0.709549	3.10401
CLEC3B	0.221853	0.684918	3.08726
ITGBL1	0.261187	0.798929	3.05884
ZNF599	0.566561	1.7271	3.04839
ZNF488	0.197198	0.593246	3.00838
LOC100506023	0.1066	0.319156	2.99396
GSDMC	0.201108	0.598368	2.97536
NLRP3	0.325094	0.966105	2.97177
HSD17B13	0.172884	0.513614	2.97086
LOC101927002	0.148796	0.440041	2.95734
DKK3	0.286748	0.847073	2.95407
C6orf223	5.31249	15.5773	2.9322
ANO9	0.105041	0.30638	2.91677
TTYH1	0.148788	0.43272	2.9083
LOC101928645	2.77522	8.01869	2.88939
CAMK1G	0.127278	0.364496	2.86378
SPDYE2B	0.269022	0.770419	2.86378
GNAT2	0.248124	0.710571	2.86377
LOC101929396	0.139853	0.400507	2.86377
CLDN2	0.325825	0.933052	2.86366
FRMD3	0.527295	1.50192	2.84835
LOC101928853	0.227163	0.644225	2.83596
PMS2P4	1.29218	3.6508	2.8253
CTSE	0.106856	0.296746	2.77706
C18orf56	1.01076	2.80688	2.777
LINC00167	0.162729	0.451898	2.777
SMC5-AS1	0.258503	0.717861	2.77699
RP11-54O15.3	0.252476	0.701124	2.77699
C3orf83	0.273176	0.758607	2.77699
CSTF3-AS1	0.116389	0.323211	2.77699
LOC100996668	0.824069	2.28843	2.77699
COX6B2	0.148157	0.41143	2.77699
VSIG2	0.224407	0.615951	2.74479
ADPGK-AS1	0.371124	1.01079	2.72359
ZG16B	1.30836	3.54934	2.71282
LOC101928816	0.640161	1.71929	2.68571
LOC102723980	0.29811	0.799726	2.68265
C16orf74	0.401147	1.07272	2.67413
CCDC81	0.156271	0.417522	2.67178
LOC101928081	0.282393	0.751528	2.66128
LOC101927144	0.459744	1.21973	2.65306
LOC101929494	1.33938	3.54822	2.64915
ATP11A-AS1	0.189463	0.501763	2.64834
CHI3L2	0.291354	0.770272	2.64377
TMEM17	0.265405	0.697798	2.62918
CRIP1	0.517324	1.34743	2.60462
RHOJ	0.30975	0.806753	2.60453
RP11-41O4.2	0.121329	0.315904	2.6037
FKBP6	0.107038	0.278679	2.60355
CSNK1G2-AS1	0.129864	0.338093	2.60344
AC104655.2	0.388325	1.01098	2.60344
LOC102724354	0.562215	1.46369	2.60343
LOC100131270	0.256086	0.666703	2.60343
LOC102723328	0.396004	1.03097	2.60343
CFLAR-AS1	0.34385	0.89519	2.60343
LOC101929946	0.345572	0.899673	2.60343
OR10V2P	0.253835	0.660842	2.60343
LOC102724593	0.320988	0.83567	2.60343
SLED1	0.262607	0.683679	2.60343
LOC728819	0.149033	0.387997	2.60343
C8orf88	0.169503	0.441289	2.60343
LOC285819	0.106841	0.278152	2.60342
KCNMB4	0.14061	0.365336	2.59822
PCP2	0.398081	1.02881	2.58442
NXNL2	0.310397	0.800758	2.57979
LOC101927255	0.683515	1.74713	2.5561
LRRN4	0.576741	1.4742	2.55609
OR7E2P	0.357334	0.913056	2.55519
FGFR3	0.316803	0.809457	2.55508
APLN	0.644829	1.64146	2.54557
PNMT	0.190781	0.483608	2.53489
OCLM	0.740095	1.87174	2.52905
RTBDN	0.189514	0.477077	2.51737
RHD	0.203611	0.512266	2.51591
SIX2	0.841169	2.10464	2.50204
C1orf106	0.259348	0.648786	2.5016
ID3	0.34781	0.869281	2.4993
LOC100505912	0.518018	1.29468	2.4993
RASGRP2	0.143255	0.357029	2.49226
BCL2A1	0.842122	2.08443	2.47521
CAPN11	0.238756	0.590526	2.47335
LOC102723663	3.67774	8.98881	2.44411
CDH23	0.283722	0.693301	2.44359
LOC102724378	0.843554	2.05963	2.44161
RGPD4	0.117795	0.287243	2.4385
DHRS9	0.171363	0.416397	2.42991
C20orf196	0.454606	1.10464	2.42988
FABP2	0.10576	0.256984	2.42988
RP4-781K5.4	0.184822	0.449095	2.42988
LOC101929949	0.193924	0.471211	2.42987
LINC00649	0.183089	0.444883	2.42987
LOC102724064,TRNAS22	0.349423	0.849053	2.42987
BDKRB1	0.196922	0.478495	2.42987
GAS6-AS1	0.312155	0.758496	2.42987
MIR345	0.218455	0.530817	2.42987
APBB2	0.314878	0.765112	2.42987
LINC01176	0.42069	1.02222	2.42987
RP11-26J3.1	0.112519	0.273406	2.42987
LOC100506083	0.170559	0.414435	2.42986
NR1I3	0.469385	1.14054	2.42986
LOC102723480	0.685634	1.65734	2.41724
EDA	0.111635	0.269724	2.41612
MNX1	0.490863	1.18396	2.412
DNAJC22	0.155005	0.371525	2.39686
SIGIRR	0.995629	2.37995	2.3904
PCDH7	0.170786	0.406534	2.38037
ATP2C2	0.158716	0.377799	2.38035
SNORD55	484.175	1152.47	2.38028
CAPN3	0.285756	0.679372	2.37745
NOXRED1	0.261519	0.619212	2.36775
FEZF1	0.272477	0.643863	2.363
LOC101927529	0.989566	2.31864	2.34309
FIGNL2	0.114965	0.269358	2.34296
LINC00669	1.56771	3.66793	2.33967
TMPO-AS1	0.512209	1.1938	2.33069
GABRR2	1.30004	3.01469	2.31892
OPTN	0.371103	0.858793	2.31416
SAMD12-AS1	0.894802	2.06844	2.31162
RP1-257A7.4	0.530446	1.22413	2.30774
LOC101927018	0.49753	1.1477	2.3068
POU5F1	0.300123	0.690715	2.30144
PRKG1-AS1	0.692154	1.59266	2.30102
RNASE1	0.584248	1.33854	2.29105
C1orf220	0.151932	0.34808	2.29102
LOC101928690	0.304144	0.6968	2.29102
NCOR2	0.80247	1.83847	2.29101
ADRA1B	1.56794	3.57522	2.2802
AIF1L	0.647034	1.46372	2.2622
ZCCHC5	0.177028	0.39943	2.25631
FAM72C	0.202711	0.457378	2.25631
PPM1N	0.246275	0.553482	2.24741
THOC7-AS1	0.650132	1.46096	2.24717
FAM85A	0.245272	0.550418	2.24411
CES4A	0.330476	0.739806	2.23861
NPFF	0.554974	1.24233	2.23854
MYH16	0.910141	2.03578	2.23677
TRNAG16	0.382025	0.852493	2.23151
LOC102724512	2.3009	5.13239	2.2306
IGSF23	0.155362	0.345984	2.22695
LOC101927471	0.184252	0.409903	2.22469
FLJ31945	0.158499	0.350745	2.21292
AKAP7	0.798256	1.76627	2.21266
MIR125A,SPACA6P	103.536	228.82	2.21005
C1orf21,LOC102724857	4.55128	10.045	2.20707
SLC12A5	0.287159	0.631895	2.20051
C1orf185	0.451262	0.992078	2.19845
SNORA9	85.5884	188.162	2.19845
PGF	1.22773	2.6964	2.19625
LOC101928498	0.684524	1.50073	2.19237
KRTAP2-3	1.10756	2.42211	2.18689
HIC1	0.732725	1.60238	2.18688
REEP1	0.536484	1.17092	2.18258
CCL5	0.842039	1.82684	2.16954
RNVU1-6	55.7235	120.894	2.16953
ADAMTS9-AS2	0.427425	0.927309	2.16952
PDGFRL	0.508454	1.1031	2.16952
PMEL	0.299299	0.646057	2.15857
NDP	0.560621	1.20933	2.15713
PTX3	19.9933	43.1126	2.15635
RDM1	0.470371	1.01078	2.1489
GPR17	0.240206	0.515623	2.14659
LOC101928820	0.801151	1.71879	2.1454
UBAP1L	0.148363	0.318065	2.14383
C1QTNF9B-AS1	0.408636	0.872997	2.13637
SHF	0.154763	0.330596	2.13614
LOC102723619	0.301102	0.642624	2.13424
LOC101928117	1.58502	3.38144	2.13337
PAQR4	4.41664	9.39368	2.12688
RP11-554F20.1	0.219483	0.466362	2.12482
CARD16	0.730956	1.55259	2.12405
CYP24A1	0.188405	0.400062	2.12341
LOC101928281	2.12539	4.51207	2.12294
SCARA3	0.817191	1.73158	2.11894
FLJ46906	0.310422	0.657619	2.11847
AC011747.7	0.117805	0.249496	2.11787
ARTN	2.2407	4.74032	2.11555
SERPINB7	0.95423	2.01861	2.11543
CD83	3.05114	6.42585	2.10605
TMEM229B	0.936552	1.96427	2.09734
ZNF726	0.415937	0.871583	2.09547
C21orf58	1.80762	3.78128	2.09186
LY6K	0.749215	1.56371	2.08713
NFKBID	1.52125	3.17342	2.08606
FABP6	0.382597	0.798041	2.08585
CPM	0.839738	1.75033	2.08438
HPCA	0.119787	0.249542	2.08321
SLC9B1,SLC9B2	0.151847	0.316311	2.08309
GNGT2	0.107763	0.22446	2.0829
TLR1	0.143632	0.299166	2.08286
HSD17B2	0.234228	0.487855	2.08282
C14orf178	0.335113	0.697966	2.08278
AC159540.1	0.184248	0.383746	2.08277
LINC00923	0.189343	0.394357	2.08277
LOC101928186	0.755959	1.57448	2.08276
RNF133	0.116269	0.24216	2.08276
LOC101927762	0.225665	0.470005	2.08276
LOC101928206	0.12942	0.26955	2.08275
MYO1F	0.105265	0.219241	2.08275
ALMS1P	0.103441	0.215442	2.08275
LOC101928124	0.102414	0.213303	2.08275
CDRT15	0.159079	0.331322	2.08275
LOC100996246	0.111769	0.232787	2.08275
SNORD41	584.501	1217.37	2.08275
LOC102724784	0.158381	0.329868	2.08275
LOC100996574	0.148907	0.310136	2.08275
FXYD7	0.141052	0.293776	2.08275
AC006272.1	0.12759	0.265738	2.08275
RPS2P32	0.257887	0.537114	2.08275
TRNAV27	72.4259	150.845	2.08275
TLDC2	0.117717	0.245175	2.08275
SNORD16	25.0746	52.2241	2.08275
LOC102724943	0.400465	0.834068	2.08275
RP4-782L23.1	0.198432	0.413284	2.08275
LOC101928997	0.823071	1.71425	2.08275
RP1-102G20.5	0.194686	0.405482	2.08275
RARB	0.168293	0.350512	2.08275
LOC101928817	0.265504	0.552978	2.08275
MIR6753	4.64362	9.67149	2.08275
ZNF487	0.223885	0.466296	2.08275
LOC102724539	0.258001	0.537351	2.08275
RP11-197N18.7	0.217686	0.453385	2.08275
LOC101927864	0.208103	0.433426	2.08275
TEX40	0.930977	1.93899	2.08275
LOC100128361	0.379492	0.790386	2.08275
LOC100126447	0.160138	0.333527	2.08275
LOC101927942	0.297315	0.619232	2.08275
LOC101927854	0.282656	0.588701	2.08275
NRN1L	0.167184	0.348202	2.08275
THEGL	0.114155	0.237756	2.08275
LOC101929447	0.354116	0.737534	2.08275
KCNIP2-AS1	0.187802	0.391144	2.08275
LOC102724322	0.254282	0.529605	2.08275
OR10A2	0.203126	0.42306	2.08275
LOC101928796	0.166762	0.347323	2.08275
HCG27	0.380257	0.791979	2.08275
LOC101928176	0.732139	1.52486	2.08275
AC018464.3	0.142725	0.29726	2.08275
LOC100996713	0.112307	0.233907	2.08275
LOC102723571	0.299784	0.624374	2.08275
LOC101927872	0.150146	0.312716	2.08275
DPH3P1	0.354676	0.7387	2.08275
LOC101927895	0.166413	0.346596	2.08275
RNVU1-7	23.2181	48.3574	2.08275
HCST	0.238405	0.496537	2.08275
SNORD14A	33.215	69.1784	2.08275
LOC101928845	0.384129	0.800043	2.08275
SNORA6	45.1178	93.9689	2.08275
LOC101929673	0.679795	1.41584	2.08275
RP11-143M1.2	0.287726	0.59926	2.08275
LINC01063	0.364806	0.759798	2.08275
LOC100130876	0.214236	0.446199	2.08275
SNORD19B	32.0273	66.7047	2.08275
AQP7P3	0.219554	0.457275	2.08275
SNORD45A	45.1145	93.962	2.08275
HIST1H1T	0.137821	0.287046	2.08275
LOC101929129	0.280017	0.583204	2.08274
RP11-430B1.2	0.109481	0.228021	2.08274
LOC101929612	478.567	996.733	2.08274
TRNS2	300.538	625.944	2.08274
BREA2	0.270447	0.563272	2.08274
CXorf28	0.152687	0.318008	2.08274
TAS2R50	0.271124	0.564682	2.08274
LOC102723867	0.447269	0.931547	2.08274
SPANXC	0.355855	0.741155	2.08274
AC007163.6	0.213646	0.44497	2.08274
LOC100505984	0.715215	1.48961	2.08274
ACKR4	0.134825	0.280806	2.08274
LOC102723744	0.239195	0.498182	2.08274
UBXN7-AS1	0.172955	0.360221	2.08274
MIR194-2	43.353	90.2932	2.08274
LOC100506036	0.11897	0.247784	2.08274
SNORD111B	24.246	50.4982	2.08274
RP11-203B9.4	0.413821	0.861883	2.08274
KRTAP2-1	0.125593	0.261578	2.08274
EPAS1	0.352669	0.734519	2.08274
LOC102724812	0.275044	0.572846	2.08274
ELOVL3	0.17755	0.369791	2.08274
LOC101927124	0.214049	0.445809	2.08274
DPYD-AS2	0.117231	0.244162	2.08274
SLC35G5	0.144412	0.300773	2.08274
LOC388499	0.102197	0.21285	2.08274
SNORA42	18.5384	38.6107	2.08274
TMEM191B	0.127457	0.26546	2.08274
LOC101928571	0.169939	0.353939	2.08274
LOC101241902	0.108821	0.226646	2.08274
SNORA72	29.2756	60.9735	2.08274
LOC100506985	1.30951	2.72737	2.08274
ACRBP	0.128547	0.26773	2.08274
RBPMS-AS1	0.101994	0.212427	2.08274
LOC101927986	0.598097	1.24568	2.08274
SCRG1	0.326062	0.679102	2.08274
TNNC2	0.149835	0.312067	2.08274
LOC100996433	0.103388	0.21533	2.08274
TMEM204	0.100841	0.210025	2.08273
CSAG1	0.157686	0.328406	2.08266
NTN5	0.139216	0.289912	2.08246
GATA3-AS1	0.172824	0.359754	2.08162
IQCH	0.347408	0.722835	2.08065
LOC101928829	0.281489	0.584996	2.07822
RRM2	38.3746	79.7223	2.07748
CHST7	2.15992	4.46548	2.06743
C8orf58	0.821996	1.69918	2.06714
C8orf37,TRNAS20	0.434637	0.897639	2.06526
ZNF530	1.85714	3.82648	2.06042
KIAA0101	16.6559	34.262	2.05705
E2F8	3.34955	6.85777	2.04737
LOC101927104	1.75079	3.58097	2.04535
KLF17	1.11189	2.27117	2.04262
DACT3	0.109681	0.223291	2.03582
TCF19	18.9385	38.5381	2.03491
ASB9	0.865145	1.75675	2.03058
ADAM12	0.573086	1.15936	2.02301
B3GNT4	0.554123	1.11923	2.01982
ABCC6	0.213116	0.428574	2.01099
LOC102723612,OLIG1	0.14622	0.293935	2.01022
MIR549	0.57906	1.16296	2.00836
TRNP1	1.69507	3.39808	2.00468
SNCG	1.27075	2.54447	2.00234
LOC101928965	0.355791	0.711885	2.00085
FST	4.25419	8.49391	1.9966
RP11-127L20.3	0.695926	1.38945	1.99655
LOC101928868	0.87611	1.74868	1.99596
IL11	10.0078	19.9626	1.9947
DSCC1	2.05984	4.10833	1.99449
MYH15	0.82763	1.64317	1.98539
LOC102724434	0.855645	1.69723	1.98357
POLR3K	10.7799	21.3655	1.98198
CASP1	0.322643	0.638636	1.97939
MIR29C	0.918589	1.81753	1.97861
DGAT2	1.78842	3.53758	1.97805
STXBP5L	0.109456	0.215994	1.97334
LOC102724170,TGFB3	0.266317	0.525444	1.973
LRRC15	0.402553	0.793894	1.97215
SNORD82	594.899	1170.19	1.96704
RARRES1	0.317668	0.623945	1.96414
DPF1	0.849644	1.66772	1.96285
CCDC28B	1.42537	2.79751	1.96266
PKMYT1	8.90776	17.4705	1.96127
ACSM3	0.112151	0.219852	1.96032
SDPR	4.56853	8.94812	1.95864
ARSE	1.54571	3.02699	1.95832
ATRNL1	1.7038	3.33045	1.95472
C8orf48	0.463957	0.90591	1.95257
INHBB	0.577236	1.12702	1.95244
CYP2F1	0.35044	0.682575	1.94777
DNMBP-AS1	1.79758	3.49841	1.94618
SLC5A11	0.154583	0.300744	1.94552
CTGF	22.8759	44.487	1.94471
NGFR	0.336425	0.653974	1.94389
SCARNA4	73.8954	142.912	1.93398
CBLN3	0.235614	0.455672	1.93398
TYMS	29.6228	57.2898	1.93398
LOC100499489	0.219353	0.424223	1.93397
ESYT3	0.335569	0.648359	1.93212
RAET1E-AS1	2.94278	5.6806	1.93035
LOC100287042	0.195361	0.376472	1.92706
LOC101929580,LOC101929619,LOC101929647	13.8599	26.6993	1.92637
SIRPB1	0.198071	0.381229	1.92471
UBE2T	21.6086	41.5376	1.92227
RP11-458D21.1	0.750614	1.44245	1.92169
LHX6	0.693561	1.33218	1.92078
EFNA3	0.946286	1.8169	1.92003
ARSI	0.46249	0.887203	1.91832
SPACA5	0.127351	0.244162	1.91724
CPED1	0.624733	1.19766	1.91707
LOC646471	0.648346	1.24144	1.91478
LOC100507156	0.847734	1.62148	1.91272
LOC100130938	6.43642	12.2965	1.91046
CATSPER3	0.371547	0.709352	1.90919
LOC101928352	0.758837	1.44876	1.90918
C3orf65	0.245718	0.469121	1.90918
DDX11-AS1	0.236721	0.451944	1.90918
LOC101928725	0.318072	0.607258	1.90918
ZNF833P	0.481601	0.919464	1.90918
ANKRD19P	0.205695	0.392709	1.90918
RNU5D-1	150.448	287.232	1.90918
ICAM4	1.29409	2.46995	1.90864
LGALS12	0.235644	0.449606	1.90799
NMNAT3	0.114691	0.218812	1.90784
CCNE2	5.25907	10.0306	1.9073
C1orf54	0.505076	0.962808	1.90626
RP11-95P2.1	0.267921	0.510161	1.90415
LOC102724791	0.346004	0.658839	1.90414
TGFBR3L	3.7129	7.0675	1.9035
GPR3	1.50887	2.86762	1.90051
LINC00957	0.618417	1.17482	1.89972
SEMA7A	6.79759	12.8715	1.89354
RP11-1094H24.4	0.340558	0.644814	1.8934
PVRL1	3.68576	6.97373	1.89207
LOC101927185	3.11498	5.87949	1.88749
TMEM74B	0.221669	0.418395	1.88748
LILRB3	0.15189	0.286545	1.88653
GRK5	6.15369	11.6038	1.88567
CAMKMT	1.28048	2.41324	1.88464
RAC3	3.47695	6.53879	1.88061
ADORA2A-AS1	0.15251	0.28661	1.87929
SMAD9	0.167247	0.314253	1.87898
EMILIN1	0.193193	0.362995	1.87892
CHRFAM7A	0.135862	0.254754	1.87509
SSR4P1	0.175579	0.32912	1.87448
C1QL1	0.277917	0.520948	1.87447
LOC100287098	0.362844	0.680141	1.87447
SPARC	0.106516	0.199661	1.87447
RP3-365O12.2	0.235798	0.441996	1.87447
LOC102724124	0.217603	0.40789	1.87447
LOC102723468	0.441289	0.826615	1.87318
E2F2	1.23658	2.31457	1.87175
CUZD1,FAM24B,FAM24B-CUZD1	3.393	6.34652	1.87047
PCSK9	10.9251	20.4188	1.86898
DNM3	0.628456	1.17441	1.86872
FITM2	3.62482	6.75488	1.86351
NRGN	10.1767	18.9566	1.86275
LINC01135,LOC101926907	0.647372	1.20442	1.86048
MOB3B	0.159824	0.297207	1.85959
DDX12P	1.54886	2.87918	1.8589
RP11-93B14.5	3.52672	6.54414	1.85559
ATAD2	20.1786	37.3809	1.8525
AURKB	21.0967	39.0753	1.8522
NALCN	0.101266	0.187482	1.85138
GPR56	4.93001	9.12106	1.85011
LOC100506302	1.94465	3.59702	1.8497
EML6	1.29947	2.40291	1.84915
N6AMT2	2.13453	3.94571	1.84851
ROPN1L	0.540184	0.997317	1.84625
GRTP1	0.851629	1.57133	1.84509
CENPI	8.71314	16.0672	1.84402
LOC101927579	0.451947	0.833236	1.84366
ARHGAP20	0.192617	0.354781	1.8419
MDGA1	2.95281	5.42683	1.83785
SNORA47	142.484	261.845	1.83772
SMTN	12.7049	23.3266	1.83603
NOG	34.371	63.0491	1.83437
CDKN2C	5.85742	10.7419	1.8339
RP11-314D7.2	1.98479	3.6349	1.83138
CDCA5	20.9505	38.3366	1.82987
PRRG4	2.87583	5.261	1.82938
PDXDC2P	0.362841	0.663519	1.82868
PBK	9.83885	17.9841	1.82787
FAM46B	2.02675	3.7022	1.82667
FBLN7	0.589099	1.07513	1.82504
SERTAD4	1.65069	3.01233	1.82489
ALG10B	0.780275	1.42283	1.8235
LOC101928373	0.38054	0.693508	1.82243
AC010226.4	1.01712	1.85361	1.82241
LOC101928089	0.55875	1.01827	1.82241
LINC00087	0.22155	0.403754	1.82241
SNORA14B	36.1453	65.8714	1.82241
ITPR1-AS1	0.234617	0.427567	1.8224
LOC100499194	0.136546	0.248842	1.8224
LOC102724548	1.77806	3.24034	1.8224
CHRNA10	0.331194	0.603568	1.8224
LOC102723666	0.253794	0.462514	1.8224
AGAP1-IT1	0.626526	1.14178	1.8224
LOC100506124	0.621094	1.13188	1.8224
GNG12-AS1	0.141152	0.257235	1.8224
CCDC159	0.952585	1.73403	1.82034
LOC101928482,LTC4S	0.620794	1.12851	1.81785
CENPW	4.71656	8.57216	1.81746
EPN2-AS1	0.874057	1.58613	1.81468
VNN2	0.124119	0.224932	1.81223
GLT8D2	0.129234	0.233765	1.80885
FAM65C	0.336034	0.60779	1.80872
SLC25A35	0.828669	1.49597	1.80527
RNASEH2A	27.1814	49.0557	1.80475
RGS4	2.985	5.386	1.80436
HAND1	0.244077	0.440273	1.80383
GLS2	0.27957	0.503326	1.80036
GPR82	0.252276	0.453778	1.79874
DENND2A	1.77093	3.17797	1.79452
LOC100996643	1.05446	1.89205	1.79433
ANKRD37	3.54651	6.36057	1.79347
FAM222A	0.858041	1.53714	1.79145
MGAT5B	0.947241	1.69658	1.79108
COL13A1	17.4929	31.3077	1.78974
FGFR4	0.312642	0.558898	1.78766
DEPDC1B	2.75945	4.9315	1.78713
EXO1	5.47317	9.77584	1.78614
IGFBP7	66.812	119.304	1.78567
LOC101929755	1.51632	2.70696	1.78522
RP11-450K4.1	0.727313	1.29841	1.78521
TMED10P1	0.659411	1.17719	1.78521
WFIKKN1	0.289297	0.516456	1.78521
MIR613	0.648036	1.15688	1.78521
NPB	2.43064	4.3392	1.78521
LMF2	15.025	26.8122	1.78451
KIAA1841	2.51235	4.48057	1.78342
ACBD7	1.25081	2.23013	1.78295
RAET1G	1.59344	2.83925	1.78184
HELLS	9.53852	16.9917	1.78138
SEMA3F	0.757816	1.34965	1.78097
ISM1	4.33986	7.72666	1.78039
LOC100507554	0.77366	1.37647	1.77917
RAB26	1.44634	2.57032	1.77712
LOC101928946	0.225457	0.400456	1.7762
LOC389602	2.24537	3.98707	1.77569
TMEM19	3.98231	7.06348	1.77371
TNFSF8	0.504554	0.894566	1.77298
UHRF1	16.5024	29.2364	1.77165
STARD13-AS	1.04829	1.85635	1.77084
SLC11A1	0.155794	0.275809	1.77034
H3F3AP4	0.841587	1.48989	1.77033
SEC16B	0.188847	0.334322	1.77033
OLFML2A	4.34488	7.68957	1.7698
LINC01121	1.20902	2.13938	1.76952
NUAK2	1.88586	3.33628	1.7691
BUB1B,PAK6	9.35448	16.5444	1.76861
HIRIP3	2.19427	3.87463	1.76579
OGN	0.25749	0.453781	1.76232
LOC100131655	0.858009	1.51209	1.76232
SRGAP2-AS1	0.407546	0.718228	1.76232
SLC25A19	2.91855	5.13837	1.76059
RAD54L	4.55497	8.01889	1.76047
ESRG	1.74532	3.07187	1.76006
CASC10	0.76723	1.35035	1.76003
CDCA7	1.57946	2.77965	1.75987
IL27RA	1.52984	2.68913	1.75779
WDR65	0.209093	0.366578	1.75318
HERC2P4	0.794215	1.3923	1.75305
PPP2R2C	0.969805	1.6964	1.74922
SAP30L-AS1	1.73291	3.03081	1.74897
MCM10	5.00019	8.73524	1.74698
CDK1	25.1298	43.8674	1.74563
ACAT2	22.0927	38.5606	1.7454
SLCO4A1	7.58512	13.2308	1.74431
ZWINT	21.7992	37.9851	1.7425
HBEGF	18.2087	31.6847	1.74009
LAMB1	9.74539	16.944	1.73867
CLSPN	7.12871	12.3848	1.73731
CCDC181	0.107546	0.186817	1.73709
CHST4	0.112622	0.195479	1.73571
FAM131C	0.144403	0.250639	1.73569
SNORA80B	105.731	183.51	1.73563
SNORA44	58.5511	101.623	1.73563
LOC101928126	0.118231	0.205205	1.73563
KCNK12	0.176969	0.307152	1.73563
LOC100506538	0.205402	0.356501	1.73563
PHKA2-AS1	0.197821	0.343343	1.73562
LOC102723806	0.265281	0.460428	1.73562
MMP9	0.10145	0.176079	1.73562
LOC102724017	2.64709	4.59435	1.73562
FLJ30679	0.121754	0.211319	1.73562
SYT2	0.116946	0.202974	1.73562
SNORD105B	199.29	345.892	1.73562
KLF2	3.87327	6.72253	1.73562
LINC00441	0.229958	0.39912	1.73562
ASAP1-IT2	0.473442	0.821716	1.73562
LOC101927898	0.469894	0.815558	1.73562
LOC100335030	0.36574	0.634786	1.73562
RHPN1-AS1	0.239073	0.41494	1.73562
CTC-436P18.1	1.11404	1.93355	1.73562
DDIT4L	0.26707	0.463532	1.73562
LOC102724841	0.482555	0.837532	1.73562
NAP1L5	0.493115	0.85586	1.73562
EFCAB10	0.384812	0.667887	1.73562
LOC440173	0.119339	0.207127	1.73562
LGALS8-AS1	0.174827	0.303433	1.73562
DKFZP434H168	0.126816	0.220104	1.73562
CCDC154	0.32653	0.566731	1.73562
LOC101927372	0.291172	0.505363	1.73562
LOC102724162	2.20683	3.83021	1.73562
GPLD1	0.195863	0.339943	1.73562
C11orf16	0.125639	0.218061	1.73562
C19orf18	1.21364	2.10641	1.73561
HESX1	0.106288	0.184461	1.73548
GCNT7	0.420458	0.728789	1.73332
TRNM	830.586	1439.52	1.73314
MFI2-AS1	1.36217	2.36034	1.73278
PLAU	87.1561	151.002	1.73255
SPC24	12.9696	22.4698	1.7325
C16orf59	2.65059	4.58987	1.73164
FANCA	6.61013	11.4439	1.73127
PRR7-AS1	0.900758	1.55861	1.73033
PRLR	1.01269	1.752	1.73005
PCNA-AS1	67.4599	116.674	1.72953
EVA1A	11.5482	19.9592	1.72834
LINC00869	1.49527	2.58022	1.72559
LOC101929078	1.89154	3.26036	1.72365
RTN4R	1.21875	2.1007	1.72365
CDT1	7.44159	12.8246	1.72337
LOC101928056	0.578364	0.995064	1.72048
AC020571.3	0.43273	0.744464	1.72039
ATP1A1OS	6.79837	11.6919	1.71981
TONSL	4.19697	7.21795	1.7198
COX7B2	0.209366	0.359952	1.71925
RAB3B	1.02275	1.75706	1.71798
AP1M2	4.56418	7.83742	1.71716
PLCXD1	3.19692	5.4893	1.71706
STMN3	4.36617	7.49619	1.71688
PRC1-AS1	2.93816	5.04288	1.71634
CENPN	12.8832	22.1056	1.71585
PAQR8	0.541029	0.927974	1.7152
NT5E	47.0274	80.6272	1.71447
APMAP	27.6956	47.4124	1.71191
PTGER4	1.8473	3.16178	1.71157
TRIM17	0.437762	0.748926	1.71081
CATSPERG	0.115927	0.198327	1.71079
MAL	0.188043	0.321343	1.70888
SNORA71C	419.071	715.71	1.70785
ZNF837	1.01075	1.72372	1.70539
UCN2	1.23712	2.10814	1.70407
LOC101927699	0.734061	1.25089	1.70407
KLHL7-AS1	0.33609	0.572719	1.70406
ARHGDIB	24.2583	41.3377	1.70406
MT1A	4.07431	6.94288	1.70406
DOCK4-AS1	0.343802	0.58586	1.70406
MGC12916	1.32	2.24936	1.70406
LOC101929901	0.772594	1.31578	1.70307
ACOT7	38.0698	64.8341	1.70303
ARHGAP25	0.211808	0.360608	1.70252
SLC1A3	1.41889	2.41406	1.70137
ANKS1B	0.800443	1.36056	1.69976
ANXA8,LOC100996760	5.40304	9.17891	1.69884
CGREF1	0.248141	0.421514	1.69869
PFKFB4	8.33785	14.1615	1.69846
PKN3	3.43694	5.83706	1.69833
SRGN	12.8914	21.8901	1.69804
HIST1H4A	79.7289	135.304	1.69705
RAD51	3.5421	6.01033	1.69683
NAAA	3.77552	6.40485	1.69642
PRPF40B	0.801537	1.35972	1.69639
LOC101928659	1.11227	1.88551	1.69519
FGF5	2.4298	4.11644	1.69415
CDC7	4.07793	6.90441	1.69312
WDR76	7.50976	12.7136	1.69294
IFFO1	0.325973	0.551734	1.69258
FLJ44511	0.174757	0.295732	1.69225
C1QL3	0.252001	0.426445	1.69224
TTC3P1	0.246726	0.417518	1.69223
WNT10A	0.531361	0.899186	1.69223
WHAMMP2	0.228964	0.38746	1.69223
CNFN	1.76717	2.99046	1.69223
LOC102723602	9.33301	15.7936	1.69223
LOC389332	0.386363	0.653815	1.69223
LOC101928419	0.762113	1.28967	1.69223
FLJ42393	0.559412	0.946653	1.69223
CTSW	0.527524	0.892691	1.69223
LOC100422556	0.362343	0.613167	1.69223
ASRGL1	0.168577	0.285119	1.69133
ERCC6L	4.39736	7.43196	1.6901
LOC101927696	1.97863	3.34307	1.68959
METTL21B	2.19481	3.70832	1.68959
TMEM158	42.3711	71.5145	1.68781
LOC101927858	0.668504	1.12712	1.68603
GUSBP3	0.961764	1.6179	1.68222
ADAMTS17	0.826733	1.38958	1.68081
ADAMTS9	8.52294	14.3253	1.68079
MCM3AP-AS1	1.05924	1.77913	1.67963
RAMP1	13.8078	23.1004	1.673
NEIL3	3.41148	5.70469	1.6722
RRM1	31.0037	51.8242	1.67155
PCNA	45.9338	76.5939	1.66748
S100A4	389.538	649.479	1.66731
LOC102723694,MIR30B,MIR30D	1175.46	1959.26	1.6668
HIST1H4C	215.11	358.495	1.66657
RSPH4A	0.144218	0.240298	1.66621
LOC101930357	0.801332	1.33518	1.6662
LOC101928450	0.747431	1.24537	1.6662
RP1-249H1.4	0.141564	0.235874	1.6662
ZNF474	0.205581	0.342539	1.6662
LOC101928917	0.197591	0.329226	1.6662
LOC101929555	0.175838	0.292981	1.6662
LOC101927886	1.1881	1.97961	1.6662
MIR4466	0.333356	0.555437	1.6662
LOC100303749	0.635705	1.05921	1.6662
ST3GAL6-AS1	0.635705	1.05921	1.6662
LOC101929609	0.568611	0.947418	1.6662
CEND1	0.249833	0.416271	1.6662
CCIN	0.207234	0.345292	1.66619
RP11-96H19.1	7.71046	12.8454	1.66597
C10orf91	0.67222	1.11977	1.66578
SAC3D1	10.6131	17.6582	1.66381
RP11-319E16.1	0.281981	0.468884	1.66282
METTL7A	0.815334	1.35565	1.66269
SLC16A2	1.78096	2.9589	1.66141
NMB	2.62271	4.35735	1.66139
HIST1H3B	294.566	489.138	1.66054
PLOD3	15.3706	25.5129	1.65985
LOC102724129	23.4871	38.9823	1.65973
PXMP4	2.651	4.39673	1.65852
FUT8-AS1	1.06816	1.77153	1.65849
CXCL3	8.32477	13.8031	1.65808
CCDC15	2.78634	4.61669	1.6569
RAD51B	1.02403	1.69609	1.65629
RAB15	1.37797	2.28186	1.65596
ANO7	0.515539	0.853503	1.65555
RCN3	1.35073	2.23539	1.65495
COL15A1	0.636771	1.05348	1.65441
ANKRD24	0.283036	0.468174	1.65411
SLC35G1	0.557392	0.921896	1.65395
NPTXR	0.874467	1.44632	1.65394
HIST1H4J	7.89581	13.0592	1.65394
DNLZ	10.6007	17.5248	1.65317
AOX1	9.78354	16.173	1.65308
ARHGEF16	0.507494	0.83863	1.65249
C11orf65	0.22673	0.374468	1.6516
TMEM253	0.137439	0.226988	1.65155
LOC101927963	0.79091	1.30562	1.65078
RAB20	3.31205	5.46105	1.64884
NFE2L1	2.89915	4.78024	1.64884
PLEKHA8P1	0.519429	0.856455	1.64884
KIAA1161	1.40151	2.31083	1.64881
PSRC1	5.089	8.37763	1.64622
ECM1	13.1542	21.6409	1.64517
ATAD5	4.10535	6.74965	1.64411
FAM120C	4.31609	7.09051	1.64281
MALL	3.93803	6.4669	1.64217
CCND3	30.8613	50.6729	1.64196
IGSF3	0.70498	1.15728	1.64158
PCGF6	9.50153	15.5837	1.64013
HIST1H2AH	76.6263	125.471	1.63744
LOC102723743	1.52485	2.49534	1.63645
RP11-112L6.4	1.00304	1.64142	1.63645
ACTRT3	0.280155	0.458458	1.63644
SNORD42B	1357.04	2220.72	1.63644
LOC101928660	0.414283	0.67795	1.63644
TMEM163	0.298702	0.488808	1.63644
RNVU1-14	65.0107	106.386	1.63644
TP73	0.794801	1.30062	1.63641
MZT2A	22.0523	36.0828	1.63624
CYP2D6	0.110653	0.181024	1.63596
POLA2	5.59898	9.15422	1.63498
LOC101930033	13.6274	22.2782	1.63481
ADRB2	19.1086	31.22	1.63382
DGCR5	0.643484	1.0513	1.63376
BCL7C	9.35888	15.2853	1.63324
MYBL2	14.1182	23.0568	1.63313
GSG2	4.89476	7.99345	1.63306
HIST1H2AG	118.207	193.005	1.63277
CHAF1B	4.9664	8.10199	1.63136
TAP2	19.2343	31.3755	1.63123
LRRC26	1.66741	2.71783	1.62997
ABLIM2	0.612034	0.996689	1.62849
ORC1	3.32646	5.41673	1.62838
PLAT	133.934	218.093	1.62836
GINS4	4.23829	6.90027	1.62808
TSPAN2	0.383517	0.624088	1.62728
RNU5F-1	242.627	394.789	1.62714
STRA13	32.6144	53.0521	1.62665
SERPINB2	2.05811	3.34754	1.62651
MAP3K6	3.57812	5.81852	1.62614
LOC102723996	0.987627	1.60467	1.62477
DLEU2	0.944754	1.53347	1.62314
ILDR2	2.04057	3.31126	1.62271
KLHL4	6.72112	10.9057	1.6226
SP5	1.24055	2.01214	1.62197
GP6	0.179677	0.291302	1.62125
ADAM22	0.505212	0.818535	1.62018
GALNT18	7.08409	11.4766	1.62005
KIF9-AS1	0.277804	0.450019	1.61992
LOC100996535	0.508074	0.823036	1.61991
HERC2P3	0.159334	0.258107	1.61991
FAM229A	1.30517	2.11426	1.61991
LOC102723721	1.53306	2.48342	1.61991
TSPAN10	0.479573	0.776854	1.61989
PANK1	1.68893	2.7357	1.61978
HHIP	0.42479	0.687761	1.61906
SYTL3	0.491938	0.796355	1.61881
ZNF367	6.0418	9.77122	1.61727
LOC100996735	2.12317	3.43089	1.61593
SERPINI1	0.512194	0.827622	1.61584
LINC00704	8.23111	13.2987	1.61566
LOC101927488	0.157346	0.254138	1.61515
LOC100996740	1.73578	2.80178	1.61413
PTN	0.518359	0.836668	1.61407
CD82	51.415	82.9645	1.61362
P2RY2	5.59626	9.02558	1.61279
E2F1	18.4323	29.725	1.61266
IGSF6	0.536224	0.864537	1.61227
TINAGL1	31.7114	51.1203	1.61205
LOC101928076	2.19955	3.54528	1.61182
ATP1A3	0.513705	0.827748	1.61133
LINC00857	4.0062	6.45383	1.61096
HTR7	2.23534	3.60061	1.61077
IGFBP4	87.4195	140.729	1.60981
SOX15	1.3315	2.14291	1.6094
WWC2-AS2	0.401513	0.646193	1.60939
HIST1H2BA	3.36755	5.41971	1.60939
C18orf54	3.61706	5.8192	1.60882
CERS6	1.81343	2.91647	1.60826
RECQL4	8.70249	13.994	1.60805
RFC3	7.92346	12.7394	1.60781
LOC101927514	0.81289	1.30663	1.60739
LINC00883	1.48195	2.38143	1.60696
ZGLP1	1.10315	1.77069	1.60512
NDC80	11.5753	18.5773	1.60491
MIR3939	1.25792	2.01863	1.60474
FSCN1	8.54131	13.7042	1.60446
MEIS1	0.124302	0.199409	1.60423
PRIM1	5.78216	9.27369	1.60385
DNA2	3.16057	5.06441	1.60237
PDGFB	0.430829	0.69025	1.60214
EPHB3	0.233527	0.374137	1.60211
LOC102724559	1.0377	1.66251	1.60211
LOC101928045,PITPNC1	2.95797	4.73743	1.60158
ZNF815P	0.275557	0.441306	1.60151
NUSAP1	26.2763	42.0645	1.60085
WT1	1.16694	1.86745	1.6003
ANLN	44.3732	70.9768	1.59954
FAM111A	14.5402	23.2572	1.59951
RNF223	0.408575	0.653189	1.5987
CCBE1	2.77877	4.44216	1.59861
ANXA8L1	1.79252	2.86502	1.59832
ARHGEF39	1.70928	2.73152	1.59805
ENOX1	0.846664	1.35286	1.59787
LOC400927	2.90301	4.63665	1.59719
LOC400927	0.473743	0.756459	1.59677
KIFC1	22.0934	35.27	1.5964
NT5M	0.15617	0.249179	1.59556
MIR3619	0.791266	1.26246	1.59549
LINC00476	0.976483	1.55704	1.59454
ZNF891	1.4604	2.32814	1.59418
INSC	0.450596	0.718035	1.59352
KLLN	0.301111	0.479576	1.59269
LOC101929225	1.10584	1.76125	1.59268
MKI67	30.7775	49.0169	1.59262
GPR126	7.36135	11.7142	1.59131
SAPCD2	5.80433	9.23231	1.59059
GGH	13.4997	21.4654	1.59006
LOC653160	0.364473	0.579434	1.58979
ESPN	0.411933	0.654752	1.58946
MMS22L	3.82983	6.08441	1.58869
C14orf37	0.883979	1.40435	1.58867
PRDM10	2.76257	4.38618	1.58772
INCENP	10.7504	17.0662	1.58749
TK1	42.8873	68.0696	1.58717
GMNN	21.0824	33.4438	1.58634
KIF18B	8.66973	13.7504	1.58602
CHRNA5	1.50174	2.38077	1.58534
SGOL1-AS1	2.68758	4.25901	1.5847
LOC101929047	3.01695	4.78023	1.58446
LOC100507131	0.759661	1.20246	1.58289
HIST1H4K	11.7591	18.6133	1.58288
SNORA7B	204.419	323.571	1.58288
CLDND2	1.12657	1.78305	1.58272
FANCI	9.13727	14.4613	1.58267
FEN1	27.1909	42.9942	1.5812
CECR5-AS1	0.339878	0.537292	1.58084
C3orf35	0.692273	1.09422	1.58062
TMEM97	12.8972	20.3836	1.58047
FAM196B	1.20686	1.90588	1.57921
TOP2A	46.1171	72.8257	1.57915
HES6	3.08139	4.86559	1.57902
SERPINE1	360.72	569.578	1.579
SPAG5	15.9526	25.1873	1.57888
CKLF,CKLF-CMTM1,CMTM1	38.7301	61.1481	1.57883
MESDC1	7.26778	11.4715	1.5784
KIAA2013	15.6259	24.6626	1.57832
NPHP1	0.965952	1.52451	1.57825
COL12A1	11.9244	18.8186	1.57816
ITGA6	51.2844	80.8381	1.57627
PUSL1	10.9781	17.285	1.5745
CRY1	7.88706	12.4172	1.57438
ADAMTSL4	2.97266	4.67971	1.57425
ENC1	17.2482	27.1349	1.5732
LIPG	5.08047	7.99075	1.57284
LOC101929004	0.320188	0.502959	1.57082
RBL1	7.2751	11.4258	1.57054
PDE4B	0.392911	0.616784	1.56978
CD37	0.410075	0.643622	1.56952
LRRC20	5.16136	8.1004	1.56943
TGOLN2	17.2769	27.105	1.56886
PDSS1	2.89055	4.53469	1.5688
C11orf91,CD59	53.7221	84.2569	1.56838
HIST1H3C	215.893	338.55	1.56814
XRCC2	4.89907	7.68175	1.568
BRIP1	4.79596	7.51902	1.56778
RMI2	5.31004	8.32084	1.567
SLC30A3	0.3053	0.478355	1.56684
TLE2	0.211225	0.33095	1.56681
LOC101929792	2.85833	4.47663	1.56617
SKIDA1	0.112496	0.17618	1.5661
LOC101928111	0.797628	1.24914	1.56607
FAM64A	5.85372	9.16699	1.56601
SLC20A2	6.53688	10.2361	1.5659
LRRC34	0.514564	0.80561	1.56562
RAB38	3.70048	5.79307	1.56549
DTNA	1.4076	2.20137	1.56392
FAM151B	0.423799	0.662368	1.56293
ZNF582-AS1	0.150512	0.235222	1.56281
LOC101929038	0.541021	0.845297	1.56241
LINC00458	0.175211	0.273718	1.56222
ZP3	0.226326	0.353559	1.56217
CENPQ	8.35811	13.0567	1.56216
C1orf162	0.201673	0.315043	1.56215
C11orf44	0.3357	0.524412	1.56214
STAT4	0.24682	0.385553	1.56208
CETP	0.108084	0.168836	1.56208
CMKLR1	0.142056	0.221902	1.56207
TULP2	0.191763	0.299548	1.56207
FAM217A	0.117883	0.184141	1.56207
RAB33A	0.159222	0.248715	1.56206
SLC10A6	0.143836	0.224681	1.56206
RP11-7F17.5	0.102154	0.159571	1.56206
MMP28	0.176119	0.275109	1.56206
LOC101927011	0.280682	0.438443	1.56206
SYNGR3	0.268735	0.419781	1.56206
GPHA2	0.264531	0.413214	1.56206
SSBP3-AS1	0.238671	0.372819	1.56206
AC007099.1	0.440281	0.687746	1.56206
RP11-103C16.2	0.185131	0.289186	1.56206
SNORA78	22.2707	34.7882	1.56206
APBB2	0.385636	0.602387	1.56206
LOC101927201	0.327541	0.511639	1.56206
TYRO3P	0.217836	0.340273	1.56206
LINC00568	0.395776	0.618226	1.56206
LOC101928319	0.331299	0.517509	1.56206
PSPN	0.535126	0.835899	1.56206
AC002454.1	0.62554	0.977131	1.56206
GRK5-IT1	0.180052	0.281252	1.56206
SNORA5C	34.3709	53.6894	1.56206
LOC102724077	0.584993	0.913794	1.56206
NTHL1	6.1702	9.63822	1.56206
LINC00341	0.550287	0.859581	1.56206
SNORD58C	143.065	223.476	1.56206
PCOLCE2	0.473701	0.739949	1.56206
ADAM20P1	0.101758	0.158952	1.56206
MIR92B	57.555	89.9043	1.56206
ASCL3	0.321703	0.502519	1.56206
LOC102724730	0.682772	1.06653	1.56206
LOC101928915	0.60459	0.944405	1.56206
ENO1-AS1	0.587373	0.917511	1.56206
RP11-158M2.5	0.235995	0.368638	1.56206
LOC102723652	0.422545	0.66004	1.56206
LOC101928673	0.239283	0.373774	1.56206
LRG1	0.54871	0.857117	1.56206
LOC439994	1.64958	2.57674	1.56206
YTHDF3-AS1	0.279375	0.4364	1.56206
DLL4	0.224283	0.350343	1.56206
PPIAP30	0.339878	0.530909	1.56206
LOC100287467	0.231311	0.361321	1.56206
ANKRD7	0.124813	0.194965	1.56206
LOC100996723	0.208705	0.326009	1.56206
SIGLEC16	0.20512	0.320409	1.56206
C2orf61	0.20931	0.326954	1.56206
C9orf152	0.176093	0.275067	1.56206
MESP1	2.70493	4.22525	1.56206
LOC102723733	0.108331	0.169219	1.56206
SNORD14C	154.307	241.036	1.56205
LOC102723409	0.71171	1.11173	1.56205
RP11-184I16.4	0.749052	1.17006	1.56205
ACTA2-AS1	1.00332	1.56724	1.56205
RP11-314C16.1	0.385636	0.602384	1.56205
SNORD117	126.417	197.47	1.56205
LOC101929986	1.04487	1.63214	1.56205
SWSAP1	1.18607	1.8527	1.56205
NPM2	0.321303	0.501858	1.56195
LOC100505555	0.320276	0.500226	1.56186
C9orf142	16.7695	26.1911	1.56183
SPOCK3	0.111592	0.174285	1.56181
LIPT2	0.570883	0.89159	1.56177
B3GAT2	1.30613	2.03977	1.56169
HNMT	5.53862	8.64801	1.5614
LOC101929661	4.09545	6.39285	1.56096
FAM111B	7.68354	11.9889	1.56034
OSBPL6	2.09101	3.26218	1.5601
LOC100506422	1.20073	1.8728	1.55972
DIAPH3	13.7651	21.465	1.55938
SERTAD4-AS1	9.00796	14.044	1.55907
RASSF7	16.1396	25.1457	1.55801
PTGFR	0.236462	0.368389	1.55792
FANCG	8.35199	13.0106	1.55778
DTL	9.32129	14.52	1.55772
PPFIA4	2.62338	4.08538	1.5573
NSUN5P1	2.15591	3.3566	1.55693
PTK7	3.87558	6.03375	1.55686
LOC100506753	0.67572	1.05179	1.55655
FAM83A	9.38855	14.6071	1.55584
TXNDC2	0.134721	0.20956	1.55551
SHCBP1	10.393	16.1658	1.55545
LOC102723722,NDUFA6-AS1	0.100796	0.156574	1.55338
CDK2	17.7166	27.509	1.55272
FLJ37453	1.5689	2.43586	1.55259
LINC01057	6.77316	10.5135	1.55223
CACNB3	0.678566	1.05316	1.55204
PASK	0.896326	1.38983	1.55059
RP11-1072A3.2	0.831405	1.28911	1.55052
USP13	4.36672	6.77003	1.55037
HHEX	1.99271	3.08861	1.54995
AP1S3	5.03267	7.79207	1.5483
UBE2C	90.3428	139.856	1.54806
ADAM8	33.1929	51.3774	1.54784
NCAPH	12.1886	18.8651	1.54777
TMEM165	23.1052	35.7601	1.54771
ITGB5	21.1009	32.6466	1.54717
FAM115C,LOC101928422	2.26429	3.50256	1.54687
SYCE2	0.295946	0.457687	1.54652
IMMP1L	9.92166	15.3419	1.5463
ETV4	14.654	22.6547	1.54597
MED11	11.0311	17.0535	1.54595
MCM3	37.7923	58.4206	1.54583
ASB16-AS1	2.2985	3.55239	1.54553
COL4A1	2.49734	3.85942	1.54541
MYB	0.186022	0.287419	1.54508
FAM69A	8.42856	13.0186	1.54458
LXN	3.50518	5.41313	1.54432
HPSE	1.76727	2.72586	1.54241
PLEKHA6	3.74021	5.76822	1.54222
PTPN22	0.572093	0.88228	1.5422
OTX1	0.163152	0.251554	1.54184
FRMD4B	0.594304	0.916225	1.54168
LINC00842	0.675754	1.04149	1.54123
EFCAB4B,LOC102723813	2.52582	3.89248	1.54108
MAPKBP1	3.19787	4.92808	1.54105
CALCR	0.450414	0.69246	1.53739
H2AFX	71.0619	109.249	1.53738
PPAPDC2	0.545376	0.838387	1.53726
FAM46C	4.04208	6.2118	1.53678
PTH1R	0.168865	0.259416	1.53623
CELF4	0.186653	0.286691	1.53596
IGFBPL1	2.98848	4.58982	1.53584
DISP2	1.06646	1.63745	1.53541
ZNF491	0.490816	0.753152	1.53449
TGM2	92.6833	142.171	1.53394
KIF2C	20.8606	31.9979	1.53389
KIAA0825	0.174885	0.268227	1.53373
AC003665.1	0.959994	1.47232	1.53368
CDC25A	6.65612	10.2038	1.533
GNB3	0.782699	1.19963	1.53268
TMEM171	20.5625	31.5081	1.53231
HIST1H2AI	56.6079	86.7406	1.53231
SRR	1.20881	1.85178	1.5319
SNORD94	146.076	223.706	1.53144
NUDT8	2.65993	4.07351	1.53144
ACACB	0.475569	0.72767	1.5301
CD274	5.29701	8.10355	1.52983
ECE1	28.6578	43.8331	1.52953
CA9	3.67673	5.62139	1.52891
CENPT	7.70952	11.7871	1.5289
RFC4	14.9782	22.8858	1.52794
GAS2L1	11.5191	17.5981	1.52773
LOC102724391	0.871956	1.33178	1.52735
MNS1	0.594401	0.907856	1.52735
AGAP1	0.508682	0.776933	1.52735
RAD21-AS1	1.79602	2.74314	1.52734
RAD9B	0.546578	0.834721	1.52718
LTB	1.22774	1.87496	1.52716
COL4A2	10.2642	15.6737	1.52703
CSF3	11.723	17.9009	1.52699
LMNB2	34.4322	52.5753	1.52692
ESAM	21.0004	32.0571	1.5265
SLIT2	3.90944	5.96745	1.52642
HMGN3	9.19779	14.0382	1.52626
HIST1H2BB	45.2348	69.0237	1.5259
HIST1H2BL	24.6552	37.6173	1.52573
ASGR1	0.332483	0.507185	1.52545
LOC101927300	0.908076	1.38492	1.52511
SFN	55.4822	84.574	1.52434
GARNL3	0.670971	1.02276	1.5243
GALNT14	0.256424	0.39072	1.52373
HIVEP3	6.35374	9.67384	1.52254
FANK1	1.53652	2.33921	1.52241
MIR4654	0.304916	0.464084	1.52201
TMEM86A	0.832791	1.26751	1.522
MARVELD1	4.89874	7.45401	1.52162
ICMT	26.4464	40.224	1.52096
OIP5	4.39234	6.68003	1.52084
APOBEC3B	8.39928	12.7735	1.52079
LOC81691	0.86727	1.31893	1.52078
SLC25A3	123.547	187.859	1.52055
FANCB	2.68823	4.08738	1.52047
LOC102723354	0.591405	0.899213	1.52047
FAM150B	0.140197	0.213133	1.52024
IL17RE	1.31234	1.99504	1.52022
CDK14	2.61128	3.96946	1.52012
ANKRD18A	0.66079	1.00379	1.51908
EBP	58.4643	88.7122	1.51737
KIF11	13.1749	19.9896	1.51725
NCAPG	17.6315	26.7389	1.51654
HERC3	4.39949	6.66863	1.51577
HAT1	24.3774	36.9469	1.51562
PLEKHH3	2.82402	4.27959	1.51542
LOC101930129	1.09091	1.65252	1.51481
RP5-1120P11.1	1.27915	1.93757	1.51473
HHIP-AS1	0.853143	1.29228	1.51473
LOC100507424	1.17505	1.77988	1.51473
SIX3	0.342025	0.518073	1.51472
TULP1	1.56998	2.37808	1.51472
POC1A	10.745	16.2649	1.51372
BZRAP1-AS1	0.28878	0.437129	1.51371
PRKCSH	58.6341	88.7272	1.51324
ASPHD1	7.39884	11.1953	1.51312
SPDL1	13.8434	20.9382	1.5125
C12orf75	43.1985	65.3164	1.51201
GALNT13	0.807309	1.22063	1.51197
LRP11	9.45379	14.2927	1.51185
AGRN	37.0042	55.9417	1.51177
CARHSP1	11.5596	17.4678	1.51111
SLC39A10	12.3351	18.6362	1.51083
SEMA4F	1.66005	2.50727	1.51036
ANKRD33B	3.71016	5.60119	1.50969
DHCR24	48.5488	73.2503	1.5088
FGD4	0.770357	1.16206	1.50847
HMGN2P46	0.809955	1.22157	1.50819
POLE2	5.41375	8.16432	1.50807
PLEKHG7	0.117738	0.177529	1.50783
LOC101927811	0.352265	0.531067	1.50758
LOC154761	1.52503	2.29845	1.50715
FER1L4	0.497534	0.749749	1.50693
PRR11	16.9576	25.5521	1.50682
FAM166A	5.45869	8.22346	1.50649
SNHG12,SNORA61	109.803	165.302	1.50544
MCM4	17.2548	25.9689	1.50502
LMO2	0.376914	0.567167	1.50477
TMEM194B	2.39271	3.59946	1.50434
LOC102724451	0.778296	1.17072	1.50421
NDUFB2-AS1	0.449078	0.675506	1.50421
PAPL	0.235341	0.354001	1.5042
LOC101928214	1.04827	1.57681	1.5042
FLJ31104	0.311203	0.468112	1.5042
C2CD4D	0.42964	0.646236	1.50413
MIR4435-1HG	46.9272	70.5735	1.50389
TRAF3IP3	0.309852	0.465871	1.50353
KIF20B	9.43797	14.1846	1.50293
RP11-66B24.1	0.60406	0.907456	1.50226
TSPAN12	1.31436	1.9738	1.50172
KNTC1	10.9209	16.3983	1.50155
IL12A	0.725923	1.08972	1.50115
LRRC8C	3.59633	5.39769	1.50089
OR2A1-AS1	11.5179	17.2856	1.50076
RANBP1	47.4756	71.2408	1.50058
ATP1B1	116.227	174.332	1.49993
TELO2	4.91779	7.37527	1.49971
GIMAP8,LINC00996	1.09972	1.6485	1.49902
GPR116	62.9089	94.2932	1.49888
ASF1B	15.4785	23.1954	1.49856
GPR137C	0.898827	1.3469	1.49851
CHTF18	4.6631	6.98746	1.49846
CLMN	2.98156	4.46548	1.4977
USP43	1.01425	1.51887	1.49753
RCAN1	49.3157	73.8389	1.49727
FRAS1	1.49187	2.23353	1.49713
CASP2	8.49565	12.7176	1.49695
CAV1	90.7016	135.706	1.49618
HIST1H2BN	109.006	163.079	1.49606
HSF2BP	0.736256	1.10128	1.49578
ITGB1	189.914	284.049	1.49567
IL1B	20.2861	30.3403	1.49562
LOC101928070	0.32056	0.479387	1.49547
PRRT3	0.588964	0.880761	1.49544
SNORA76,SNORD104	3148.05	4707.58	1.4954
C4orf48	44.8666	67.0742	1.49497
HS3ST1	5.28652	7.89857	1.4941
C9orf40	11.4213	17.062	1.49388
CARNS1	0.202519	0.302417	1.49328
ZNF764	1.53049	2.28485	1.49289
LOC100506730	0.946244	1.4124	1.49264
RCL1	2.18676	3.26403	1.49263
MRC2	1.48887	2.22219	1.49253
NRP2	5.34136	7.97105	1.49233
LOC101927673	1.82769	2.72648	1.49176
KCNN4	6.94587	10.3582	1.49127
LRIG3	2.31361	3.45003	1.49119
CAMK1	9.37633	13.9695	1.48987
EPHB6	0.480786	0.716249	1.48975
LOC101928926	1.91633	2.85233	1.48843
PXMP2	8.89171	13.2339	1.48834
CAMK2B	0.446401	0.664393	1.48833
HCN2	0.622132	0.925673	1.4879
POLD3	7.18629	10.6916	1.48778
FLJ39632	0.728361	1.08357	1.48768
LOC101927151	1.02335	1.52242	1.48768
EPPK1	0.127889	0.190258	1.48768
LINC00926	0.21831	0.324775	1.48768
RP4-591N18.2	0.291971	0.434358	1.48768
ATP5J2-PTCD1	1.93469	2.87819	1.48768
ADM5	0.528935	0.786883	1.48767
FAM225A	0.270683	0.402688	1.48767
FLJ37201	0.14602	0.21723	1.48767
PRICKLE2-AS3	0.174812	0.260063	1.48767
EPHA2	55.9796	83.2689	1.48749
TBX19	0.446852	0.664662	1.48743
UBTD1	11.8208	17.5775	1.487
C15orf52	10.3606	15.404	1.48679
TMPO	30.1363	44.8025	1.48666
COL8A1	24.8829	36.9866	1.48643
CDC45	7.56114	11.2361	1.48603
BUB1	20.3451	30.2261	1.48567
CRABP2	3.56017	5.28869	1.48552
TNFSF15	10.4042	15.4466	1.48465
UBASH3B	7.97966	11.846	1.48452
PP2D1	0.46306	0.687402	1.48448
POLR2L	111.902	166.108	1.48441
PRG2	0.927285	1.37567	1.48355
MIR3917,STMN1	156.33	231.896	1.48337
TACC3	22.4891	33.3506	1.48297
NCAPD3	13.5226	20.053	1.48292
KRT15,MIR6510	2.95374	4.37959	1.48273
C16orf87	2.37826	3.52512	1.48223
LOC101927789	4.14881	6.1488	1.48206
GSTT2B	1.5335	2.27227	1.48175
DOK7,LOC102724043	0.243693	0.360914	1.48102
SCARF2	0.494145	0.731838	1.48102
DNMT1	30.2029	44.728	1.48092
CCDC74A	0.416639	0.616573	1.47987
NABP2	12.2575	18.138	1.47975
TSPAN4	31.0692	45.9545	1.4791
PDZK1IP1	30.4971	45.0434	1.47697
CD44	149.188	220.307	1.47671
SLC29A1	44.7502	66.0703	1.47642
CENPA	7.2318	10.6742	1.47601
HTRA3	0.444319	0.655799	1.47596
DCTPP1	10.9214	16.119	1.47591
CTPS1	19.9287	29.4047	1.4755
JAM3	0.26142	0.385668	1.47528
NPPB	1.74373	2.57249	1.47528
LOC101928862	0.496222	0.732065	1.47528
SLC39A3	9.91471	14.6247	1.47505
LIG1	8.23529	12.1471	1.47501
LOC102724455	3.09423	4.56108	1.47406
NCEH1	38.6717	57.0025	1.47401
LOC101928963	1.21993	1.79749	1.47344
SNRNP25	8.07747	11.8953	1.47265
POLE	6.43015	9.4622	1.47154
CEP85	7.46667	10.9867	1.47143
C1orf110	4.30427	6.33288	1.4713
NUDT1	16.1534	23.756	1.47065
SLC9A7	11.1995	16.4638	1.47005
FANCM	1.82389	2.68073	1.46979
SMIM4	21.5267	31.6299	1.46933
STIL	8.72235	12.8145	1.46916
THOP1	20.1783	29.6426	1.46903
HAS3	0.713166	1.04766	1.46903
AKAP12	2.8964	4.25443	1.46887
KIAA1524	9.68073	14.2192	1.46881
ANO8	2.88271	4.2341	1.46879
LYNX1	0.198129	0.291001	1.46875
SLC25A1	29.3284	43.0752	1.46872
STOML1	3.43133	5.03894	1.46851
RP11-379B18.5	0.559332	0.821347	1.46844
IQGAP3	16.6588	24.457	1.46811
KHK	1.24256	1.82418	1.46808
LOXL2	64.0573	94.0396	1.46805
LOC102723814	0.100183	0.147056	1.46787
TEAD4	4.5157	6.62662	1.46746
GCA	2.83555	4.16041	1.46723
SLC38A4	1.39735	2.05015	1.46717
CCHCR1	9.70562	14.2384	1.46703
TUBB6	57.4556	84.2728	1.46675
SPAG1	4.76721	6.98636	1.4655
HIST1H2BC	221.015	323.809	1.4651
MELK	26.5252	38.858	1.46495
LOC102724697,MYO1D	0.304377	0.445869	1.46486
TMEM200B	5.54885	8.12502	1.46427
TMEM99	11.1012	16.2521	1.46399
LINC00152	117.107	171.437	1.46393
DUT	18.7143	27.3963	1.46392
RNR1	37.7576	55.2604	1.46356
WTIP	8.26846	12.1003	1.46343
IQCC	1.49955	2.19424	1.46327
LEPREL1	6.22553	9.10726	1.46289
LMNB1	13.7062	20.0478	1.46268
TIMP3	24.0423	35.1656	1.46266
MEGF6	1.68559	2.4654	1.46263
HJURP	10.7522	15.7263	1.46261
SPC25	8.89154	13.0026	1.46236
RP11-418J17.1	5.72901	8.37782	1.46235
C4orf46	7.43866	10.8779	1.46235
DOCK4	8.37352	12.2432	1.46213
PVRL3	12.5001	18.2763	1.46209
NIM1K	0.561634	0.821107	1.462
CD97	44.7642	65.4308	1.46168
G0S2	155.129	226.678	1.46122
NASP	24.2872	35.4877	1.46117
FN3KRP	14.5784	21.2975	1.46089
SUV39H1	7.97137	11.6447	1.46082
EDN1	3.30772	4.83191	1.4608
GUSBP1	2.07721	3.03435	1.46078
PAGE5	1.39018	2.03051	1.46061
EMC8	13.0767	19.0998	1.4606
KDR	1.01127	1.47692	1.46046
MEX3D	22.9861	33.5673	1.46033
SLC25A45	2.84688	4.15728	1.46029
CRIM1	38.7053	56.5189	1.46024
GTSE1	11.4729	16.752	1.46014
BIRC5	18.9087	27.6051	1.45992
TSPAN14	12.7245	18.5738	1.45969
GJB2	4.46804	6.52111	1.4595
ARHGAP18	11.4926	16.7727	1.45943
FAM134C	13.4101	19.5668	1.45911
DOHH	7.21614	10.5288	1.45906
HMHA1	10.3652	15.1221	1.45893
MIR6789,PLEKHJ1	21.0773	30.7444	1.45865
C2orf48	1.00992	1.47292	1.45845
PDZD7	0.305507	0.445451	1.45807
LANCL3	0.118425	0.172667	1.45803
TMEM14A	8.87088	12.9331	1.45793
LOC101929185	1.03012	1.50184	1.45793
LOC101927635	1.49524	2.17995	1.45793
LOC100289361	0.855737	1.2476	1.45792
C21orf119	1.7276	2.51871	1.45792
GPR83	0.176907	0.257917	1.45792
LOC101929781	1.80565	2.6325	1.45792
SNORD3C	9.13203	13.3138	1.45792
RP11-397C18.2	0.417387	0.608518	1.45792
LOC100996746	0.741267	1.08071	1.45792
RP5-1021I20.1	0.461109	0.672261	1.45792
NODAL	0.191511	0.279208	1.45792
RPSAP9	1.45689	2.12403	1.45792
LOC102724751	0.343835	0.501284	1.45792
FAM13A-AS1	0.239937	0.349809	1.45792
LOC284412	0.168453	0.245591	1.45792
CCDC144CP	0.270532	0.394414	1.45792
LNP1	0.537197	0.78319	1.45792
DLEU2L	0.247946	0.361485	1.45792
FLJ44313	0.192533	0.280697	1.45792
DONSON	9.01314	13.1404	1.45792
SUSD2	0.121055	0.176488	1.45792
LOC101927151	0.813552	1.18609	1.45792
ZNF69	6.09123	8.88039	1.4579
PBX3	5.72682	8.34806	1.45771
ICAM2	10.7052	15.6044	1.45765
CDCA8	12.3403	17.982	1.45718
LINC00623	5.10563	7.43894	1.45701
ARHGAP22	10.2228	14.8913	1.45668
C16orf95	2.13905	3.11556	1.45652
EFHD2	70.8187	103.112	1.456
PRIM2	12.5889	18.3292	1.45598
SPIN4	3.8027	5.53636	1.4559
LPAR2	2.53759	3.69439	1.45587
ATP5G1	64.3058	93.6204	1.45586
WDR62	7.39937	10.7719	1.45579
TAF5	4.49613	6.54519	1.45574
OSTF1	13.1818	19.1879	1.45564
SRPX	12.2172	17.7828	1.45555
NCAPG2	31.0101	45.1161	1.45488
CXCL1	53.1851	77.3688	1.45471
MIR3605,PHC2	65.815	95.7099	1.45423
KIF4A	13.1433	19.1107	1.45403
ANKRD44	0.732943	1.06535	1.45352
PGAM1	220.264	320.158	1.45352
GGCT	19.4003	28.1899	1.45307
LRIG1	4.73682	6.88246	1.45297
TOPBP1	8.11576	11.7906	1.4528
FLNC	39.6324	57.5482	1.45205
SNX32	0.406866	0.590669	1.45175
GRN	77.8018	112.928	1.45148
SLC45A1	0.789057	1.14518	1.45133
SKAP1	0.163959	0.237942	1.45123
FSBP,RAD54B	3.84858	5.58509	1.45121
ADAMTSL1	3.60366	5.2282	1.4508
RNR2	56.9963	82.6888	1.45077
MMD	8.12251	11.7822	1.45056
LOC642846	0.612951	0.889074	1.45048
CTSC	15.0429	21.8159	1.45025
ECM2	0.215465	0.312454	1.45014
COL17A1,MIR936	5.16496	7.48885	1.44993
CSF2	69.9896	101.473	1.44983
NDUFS3	34.0093	49.3051	1.44975
TOR4A	16.3505	23.6939	1.44912
DEPDC4	0.423625	0.613546	1.44832
CHAF1A	12.483	18.0662	1.44726
ANKRD61	1.04936	1.51855	1.44712
TICRR	3.08485	4.46241	1.44656
SPIDR	7.94642	11.4944	1.44649
PLK4	6.98415	10.0974	1.44576
FLJ23867,QSOX1	125.826	181.882	1.4455
EVPL	3.26719	4.72092	1.44495
CCDC80	16.2873	23.5277	1.44454
SMC2	15.8257	22.8599	1.44448
CLHC1	1.48879	2.15019	1.44425
VWA1	2.63972	3.81141	1.44387
HTRA1	9.44351	13.6347	1.44382
PHF19	42.0572	60.6984	1.44323
FSIP1	0.16468	0.237637	1.44302
HAUS8	5.98451	8.63083	1.44219
LINC00265	0.633633	0.913765	1.4421
ESCO2	6.28771	9.06721	1.44205
FABP3	1.04765	1.51061	1.4419
LOC643072	0.419571	0.60498	1.4419
ADAM15	31.5909	45.5496	1.44186
FBXL8,HSF4	2.75621	3.97386	1.44178
TRAF2	12.1537	17.5197	1.44151
RNF208	5.91606	8.52722	1.44137
CXorf57	0.889129	1.28142	1.44121
PPL	2.21247	3.18816	1.441
SFXN2	2.89024	4.16407	1.44074
C1orf74	1.79398	2.5838	1.44026
SLFN13	3.11082	4.48006	1.44015
CGN	0.309345	0.445504	1.44015
CEP76	3.67532	5.29097	1.43959
CREB5	1.31763	1.89666	1.43945
MVK	9.86256	14.1962	1.4394
WDHD1	12.193	17.5476	1.43915
TBC1D4	6.47271	9.31421	1.439
KIF23	13.2025	18.996	1.43882
CDAN1	1.83812	2.64431	1.43859
GJB3	3.14848	4.52881	1.43841
TP53I13	15.7387	22.6384	1.43839
LOC100129781	0.791753	1.13875	1.43826
RTN4IP1	1.24531	1.79086	1.43808
ING2	7.52395	10.8194	1.43799
ZNF821	1.06663	1.53361	1.43781
ENDOD1	4.01697	5.77552	1.43778
RELT	6.43335	9.24819	1.43754
ASIC1	0.383049	0.550464	1.43706
CCDC85C	8.51901	12.2421	1.43703
BCL2L12	12.5782	18.073	1.43685
NCAPD2	22.8823	32.8776	1.43681
PDLIM2	3.31519	4.7595	1.43566
SQLE	12.2487	17.5826	1.43547
RNU5B-1	2297.53	3297.48	1.43523
CD99P1,MIR6089-1	1.21138	1.73838	1.43504
LOC101929340	1.06454	1.52705	1.43447
TMEM91	1.48623	2.13159	1.43423
NUF2	9.6225	13.7947	1.43359
UBE2S	103.058	147.729	1.43345
HIST1H4H	195.269	279.839	1.43309
TCIRG1	24.8643	35.6261	1.43282
MORC4	21.2942	30.5099	1.43278
LIN9	3.29176	4.71627	1.43275
C2orf76	2.44768	3.50616	1.43244
CENPM	10.5554	15.1149	1.43196
SRPX2	2.03276	2.91069	1.43189
LOC102724345	0.491602	0.70392	1.43189
SNORA3	246.756	353.327	1.43189
LOC102724872	0.326613	0.467673	1.43189
ITPK1-AS1	0.128348	0.183779	1.43188
TM4SF1	45.1139	64.5917	1.43175
PCOLCE	0.632011	0.904841	1.43169
BTG2	0.690063	0.987942	1.43167
RAB30	1.36182	1.94941	1.43147
CKS1B	112.496	161.019	1.43133
CSRP2	9.91726	14.1937	1.43121
S100A5	2.52706	3.61662	1.43116
SLC27A5,ZBTB45	4.87419	6.97464	1.43093
GNA15	22.8073	32.635	1.4309
CNTNAP1	3.85726	5.51934	1.4309
RP11-399K21.14,ZNF503-AS2	0.415119	0.59395	1.43079
PILRA,PILRB,PVRIG2P,STAG3L5P,STAG3L5P-PVRIG2P-PILRB	8.03113	11.4889	1.43055
POU2F2	11.2231	16.0539	1.43043
CCDC88C	4.17784	5.97531	1.43024
ASPM	11.3306	16.2052	1.43022
PTPRF	37.2869	53.322	1.43005
AXL	133.871	191.383	1.42961
ZNF610	0.804254	1.14923	1.42894
NUDT15	10.2293	14.6163	1.42887
NOTCH1	7.87241	11.2464	1.42858
PBX4	2.36587	3.37823	1.4279
LOC102723489	2.1773	3.10849	1.42768
TMEM109	31.2961	44.6726	1.42742
FBP1	10.2965	14.6974	1.42742
NUP205	22.7792	32.5133	1.42732
SKA3	9.29028	13.2598	1.42728
LOC101927609	0.938445	1.33942	1.42728
CERS1,GDF1	0.984901	1.40533	1.42687
TOR2A	5.48747	7.82915	1.42673
GPR39	1.02568	1.46329	1.42665
TRIAP1	16.3402	23.3016	1.42603
ULBP3	1.61509	2.30209	1.42536
HIST1H2BO	145.844	207.877	1.42534
RBX1	22.2268	31.6796	1.42529
S1PR2	1.7328	2.46966	1.42524
STC1	41.7348	59.4757	1.42509
MIR15B,MIR16-2,SMC4	21.1271	30.1072	1.42505
PARD6G	0.97321	1.38577	1.42392
HSD11B1L	1.0063	1.43263	1.42366
SMC6	7.67605	10.9277	1.42361
FOXM1	23.6129	33.6069	1.42324
CDYL2	2.60334	3.70476	1.42308
TNC	11.2518	16.0085	1.42275
SMA5	1.90003	2.70253	1.42236
COL8A2	0.12063	0.171566	1.42225
CKB	22.1402	31.4866	1.42215
LOC101926967	0.478789	0.680796	1.42191
C7orf43,MIR4658	5.66875	8.05916	1.42168
KLHDC9	0.732621	1.04124	1.42125
RDH11	30.929	43.9558	1.42118
KCNC4	1.35599	1.92711	1.42118
FARS2	5.8857	8.3623	1.42078
DPH6	2.43159	3.45432	1.4206
GM2A	11.817	16.7826	1.42021
MBOAT1	1.07971	1.5334	1.4202
LOC101930644,MARC1	0.777856	1.1046	1.42006
LOC100129534	0.775955	1.1019	1.42006
CNPY4	3.12937	4.44387	1.42005
LINC00896	0.396106	0.562491	1.42005
LOC645967	0.732707	1.04048	1.42005
LOC102723865,PDZD2	1.6176	2.29697	1.41999
IFI6	8.17424	11.6059	1.41981
HYAL3,NAT6	9.26399	13.151	1.41958
GPC1,LOC102723995,MIR149	5.69352	8.08028	1.41921
BIRC3	23.9645	33.9964	1.41862
NUAK1	4.78753	6.79132	1.41854
MPRIP	22.7625	32.285	1.41834
EFCAB5	0.366686	0.520078	1.41832
LETM2	3.16751	4.49219	1.41821
TPX2	45.3433	64.3017	1.41811
LOC643406	0.943087	1.33733	1.41803
CCBL1	4.42498	6.27466	1.41801
AC007773.2	1.94734	2.76119	1.41793
EXOSC2	14.6262	20.7332	1.41754
ZNRF1	8.26217	11.7093	1.41722
OAS3	2.9771	4.21905	1.41717
TMCO6	2.89608	4.10367	1.41697
SLC16A10	0.199206	0.282254	1.4169
PLOD2	56.0504	79.3898	1.4164
KAT2B	4.18835	5.9308	1.41602
ADCY6	3.88568	5.50217	1.41601
FLVCR2	1.48449	2.10204	1.416
ZNF154	0.518291	0.73336	1.41496
SPEF1	0.268393	0.379746	1.41489
RPA1	35.7949	50.6296	1.41444
NCAPH2	11.8685	16.7788	1.41373
COL6A1	14.3531	20.2904	1.41366
IKBIP	21.9818	31.0734	1.4136
PRSS48	0.473042	0.668667	1.41355
PSTK	3.00991	4.25447	1.41349
C1orf86,LOC100506504	24.4199	34.5159	1.41343
LRFN4	8.59106	12.1397	1.41306
MIR4767,STS	7.44221	10.5132	1.41264
FJX1	10.2956	14.5402	1.41227
VSTM4	0.183337	0.258875	1.41202
CNN3	113.394	160.093	1.41183
NUDT16	4.19485	5.92113	1.41152
DLX4	0.23947	0.337971	1.41133
PARP1	22.132	31.2336	1.41124
LRRC29	0.522465	0.737271	1.41114
GPR155	0.579318	0.817481	1.41111
C15orf37	1.18863	1.67703	1.41089
MT2A	1128.47	1591.39	1.41022
GINS1	10.3449	14.5867	1.41004
MCM2	16.0242	22.594	1.40999
C17orf96	6.66947	9.4011	1.40957
CAMK2N2	8.28572	11.6777	1.40938
GLIPR1	10.1716	14.3351	1.40933
LINC00240,TRNAI2	1.67742	2.36402	1.40932
MAGEE1	0.701337	0.988124	1.40891
TMEM194A	9.71283	13.6794	1.40838
CKAP2L	15.0848	21.2373	1.40786
FAM84B	11.1177	15.6509	1.40775
DDB2	4.47168	6.29272	1.40724
GPAA1	22.912	32.2355	1.40693
AHNAK	128.432	180.629	1.40642
MAD2L1	23.8149	33.4923	1.40636
C4BPB	8.32353	11.7049	1.40624
EHD1	51.1787	71.9675	1.4062
ZBED5-AS1	14.1072	19.8375	1.4062
ZNF804A	0.322014	0.452705	1.40586
NYAP2	0.328984	0.462503	1.40585
PRC1	23.9215	33.626	1.40568
WRAP53	7.14993	10.0505	1.40568
BMPER	3.39159	4.76686	1.40549
POLD1	12.1759	17.1122	1.40542
FAM131A	7.07317	9.93902	1.40517
MAP2K3	39.5216	55.5268	1.40497
MYH7B	0.266184	0.373968	1.40492
PLXNA1	12.8642	18.0665	1.4044
ARHGEF34P,OR2A7	0.726069	1.01962	1.4043
RP4-724E16.2	0.951091	1.33494	1.40359
LOC100996873	0.347021	0.487074	1.40359
MIR4479	2.44394	3.43028	1.40359
CTDSPL	10.7544	15.0938	1.4035
CFLAR,LOC102724614	26.1809	36.7439	1.40346
GALNT6	4.40316	6.17957	1.40344
GGCX	6.5306	9.16513	1.40341
ATP6V0E2	8.75104	12.279	1.40315
MINOS1,MINOS1-NBL1,NBL1	39.1279	54.8858	1.40273
GPRC5A,MIR614,RPL13AP20	58.471	82.0173	1.4027
CENPC	4.25524	5.96809	1.40253
SEMA3E	0.101512	0.14237	1.40249
MYEOV	62.9864	88.3373	1.40248
SNRPF	38.7446	54.3386	1.40248
SAAL1	10.0628	14.112	1.40239
SVIP	8.75787	12.2797	1.40213
USP6NL-IT1	1.38748	1.94504	1.40185
TFPT	14.9406	20.9425	1.40172
C1orf112	7.18231	10.0642	1.40125
SKA2	15.9085	22.2903	1.40116
CENPU	16.827	23.5664	1.40051
LOC101927810	2.61759	3.66584	1.40046
MGST2	12.888	18.0487	1.40043
CENPF	26.9753	37.7607	1.39983
FSTL1,MIR198	37.2389	52.1262	1.39978
CPA4	15.3172	21.4403	1.39975
C11orf45	0.673862	0.943004	1.3994
SNHG9	46.667	65.3032	1.39934
HAS2	0.751562	1.05169	1.39934
GUSB	16.4182	22.9728	1.39923
GINS3	3.61665	5.06027	1.39916
CIDECP	14.3262	20.0375	1.39866
MFI2	25.8344	36.1214	1.39819
LOC102724935,TTC32	14.4112	20.1454	1.3979
FAM83D	10.7909	15.0844	1.39788
HIST1H3H	73.8353	103.165	1.39723
FAM13C	0.231959	0.324075	1.39712
GCSAM	0.538704	0.752499	1.39687
OTUD3	3.82463	5.34159	1.39663
KIF22	12.8245	17.9076	1.39636
BOLA3	28.6452	39.9987	1.39635
AMOTL2	15.9143	22.2195	1.3962
S100A3	12.238	17.0857	1.39612
HMGXB4	4.84316	6.76156	1.39611
PLAC4	1.01578	1.41807	1.39604
SPDYE1	1.08846	1.5194	1.39592
ACHE	0.723382	1.00963	1.39571
OSR1	3.07055	4.28434	1.3953
GPR125	15.7339	21.9517	1.39518
STOX1	0.179505	0.250359	1.39472
PARPBP	2.80768	3.91585	1.39469
CLN6	8.24223	11.4934	1.39445
TNFRSF9	1.94756	2.71578	1.39445
POLA1	6.80339	9.48684	1.39443
MBLAC1	1.339	1.86708	1.39438
TBXA2R	1.02281	1.42595	1.39415
DLGAP5	16.6529	23.2145	1.39402
TPM2	8.25217	11.503	1.39394
KCNQ5-IT1	7.46167	10.4009	1.39391
TENM3	0.595457	0.829881	1.39369
HS3ST5	0.487454	0.679207	1.39338
HMGN2	109.158	152.076	1.39317
LOC101927263,LOC102724872,NR2F2	23.315	32.4758	1.39291
LINC00705	1.7395	2.4227	1.39276
SOGA2	7.07163	9.84854	1.39268
HAUS5	4.49171	6.25529	1.39263
LOC101929304,SNX29	2.33884	3.25705	1.39259
CFL1	508.777	708.471	1.3925
ACTA2	1.14456	1.59359	1.39232
AP001258.4	1.01392	1.41152	1.39214
PSPC1	15.107	21.031	1.39214
RGMB	16.4445	22.8889	1.39189
TRPC1	1.82473	2.53929	1.3916
MRPL12	42.2254	58.753	1.39141
KIF24	2.92764	4.07303	1.39123
GPRIN1	2.87721	4.00189	1.39089
GNB3	0.417003	0.579865	1.39055
PTRF	116.054	161.333	1.39015
CASZ1	1.74718	2.4285	1.38995
FOXD2-AS1	1.31298	1.82496	1.38994
WHAMMP1	3.77653	5.24893	1.38988
ZNF876P	0.263321	0.365949	1.38974
SLC12A9	3.58111	4.97666	1.3897
ESR2	0.988298	1.37332	1.38958
IDI1	46.1111	64.0723	1.38952
ITGB2	2.09307	2.90703	1.38888
SNTB2	5.13312	7.12821	1.38867
LOC101927803	0.30871	0.428687	1.38864
C17orf82	0.325973	0.452651	1.38862
GPRIN2	0.133505	0.185382	1.38858
AKR7A3	0.175111	0.243147	1.38853
LOC101926931	1.1323	1.5722	1.3885
MMP21	0.126077	0.175058	1.3885
GIMAP2	0.174404	0.24216	1.3885
FLJ40448	0.111879	0.155344	1.3885
BVES-AS1	0.142973	0.198518	1.3885
IPO9-AS1	0.337972	0.469274	1.3885
RASA1	2.2616	3.14023	1.3885
SOWAHD	0.155944	0.216528	1.3885
LOC102724597	0.833584	1.15743	1.3885
USP30-AS1	0.557604	0.774232	1.3885
LOC101927044	0.631047	0.876207	1.3885
LOC102724248	0.214241	0.297473	1.3885
LOC102724708	0.489093	0.679104	1.3885
FOXF2	2.6175	3.63439	1.3885
LOC102724224	0.310811	0.43156	1.3885
LOC101929051	0.68449	0.950412	1.3885
LOC102724360	0.648796	0.900851	1.3885
HBCBP	0.175963	0.244324	1.3885
TMEM52	0.57234	0.794692	1.3885
MIR3613	0.26991	0.374769	1.3885
LOC389641	2.20396	3.06019	1.3885
LOC388436	0.5599	0.777419	1.3885
RP11-840I19.3	0.62431	0.866852	1.3885
LOC101928970	0.407243	0.565455	1.3885
CBWD3	0.217926	0.302589	1.38849
SLX1A,SLX1A-SULT1A3,SULT1A3	0.256058	0.355535	1.38849
CHAD	0.144983	0.201308	1.38849
LOC101060264	2.18902	3.03944	1.38849
DGUOK-AS1	1.75218	2.43289	1.38849
PCED1B	0.273835	0.380218	1.38849
LOC101927479	1.58129	2.19561	1.38849
ADRA2C	0.123279	0.171172	1.38849
EN2	1.08499	1.5065	1.38849
SNORD79	152.971	212.399	1.38849
DIRAS3	0.151473	0.210319	1.38849
KRTCAP3	0.319995	0.44431	1.38849
C17orf78	0.130405	0.181066	1.38849
SPATA32	0.199865	0.277486	1.38837
EFEMP1	3.49341	4.84938	1.38815
ITGB4	27.451	38.1013	1.38797
TSPAN5	14.4543	20.0597	1.3878
CDCA4	13.8816	19.2634	1.38769
TNFRSF10D	8.9786	12.4592	1.38766
CSF1R	0.409099	0.567563	1.38735
NWD1	0.309844	0.4298	1.38715
TRMT2B	8.56491	11.8793	1.38697
LAT	0.447103	0.620115	1.38696
ATP2B4	18.4698	25.6164	1.38693
GPN3	14.9061	20.6737	1.38693
HIST1H2AB	46.5902	64.5995	1.38655
TMEM238	2.81799	3.90527	1.38584
LOC101928574	4.47238	6.19747	1.38572
ZNF570	2.5181	3.48923	1.38566
MUC22	0.385604	0.534292	1.3856
SSBP3	6.10835	8.46105	1.38516
AZI1	2.6409	3.6574	1.38491
PLP2	269.334	372.964	1.38476
MAP3K3	11.4419	15.8343	1.38389
DCBLD1	2.93775	4.06517	1.38377
HIST1H3A	36.9299	51.0899	1.38343
SLC8B1	13.2734	18.3606	1.38326
LOC101927848	3.52634	4.87625	1.38281
CCDC88A	10.1248	13.9991	1.38265
SOX9	16.3766	22.6314	1.38194
SNHG18	2.74899	3.79748	1.38141
PTTG1	79.7021	110.082	1.38117
VOPP1	31.4357	43.4041	1.38073
SHPK,TRPV1	4.04556	5.58546	1.38064
ACTB	1432.94	1978.27	1.38057
COTL1	98.6612	136.19	1.38038
ARHGAP11A	10.5416	14.5494	1.38019
CAPN12	10.1589	14.02	1.38007
CIT,MIR1178	9.21184	12.7123	1.38
SFRP5	0.780402	1.07685	1.37987
MIR146A,MIR3142	356.478	491.887	1.37985
ZNF718	3.6647	5.05644	1.37977
SYDE1	14.1183	19.4789	1.37969
B3GNTL1	3.94108	5.43712	1.3796
TAF3	5.78667	7.98173	1.37933
HTR7P1	0.637833	0.879645	1.37911
ACYP2	5.22309	7.20324	1.37911
ANKRD1	58.6397	80.8697	1.37909
NUDT16L1	6.0438	8.33274	1.37873
MAPK11	1.42626	1.96593	1.37838
RNU5E-1	2363.35	3257.38	1.37829
TLR8	0.502755	0.692748	1.3779
NPC1	34.0303	46.8695	1.37729
INPP5B	2.89655	3.98896	1.37714
ST8SIA5	0.244283	0.336408	1.37712
NDUFA3	86.0764	118.537	1.37711
GPR153	5.06109	6.96939	1.37705
HSPG2	9.98334	13.7467	1.37696
CARD10	5.00634	6.89261	1.37678
KIAA0586	5.2193	7.18578	1.37677
MAMDC4	1.23145	1.69538	1.37673
ZBED6CL	4.78255	6.58428	1.37673
ASB16	0.66041	0.908824	1.37615
LOC730183	5.30807	7.30443	1.3761
NME7	58.4288	80.399	1.37602
ZSCAN16-AS1	1.33255	1.83297	1.37554
LOC101929719	0.116547	0.160314	1.37553
COLGALT1	50.2254	69.0839	1.37548
DOCK2	2.74516	3.77549	1.37533
ATP8B3	1.42537	1.9602	1.37522
SAMD10	5.52106	7.59251	1.37519
LOC100996724	2.10636	2.89653	1.37514
RP5-1033H22.2	1.32627	1.82311	1.37461
RGCC	1.99028	2.73586	1.37461
GTPBP3	5.63073	7.73986	1.37457
NUDCD1	23.4416	32.2168	1.37434
ZNF785	1.52652	2.09776	1.37421
RP11-861A13.4	0.150979	0.207406	1.37374
BOP1	21.7726	29.9082	1.37366
ANKRD39	7.12819	9.78989	1.3734
SCNN1D	2.36106	3.24201	1.37312
CD99	134.511	184.632	1.37262
COX10-AS1	2.22751	3.0574	1.37256
GGT8P	0.311932	0.428123	1.37249
FGF11,TMEM102	2.25903	3.10039	1.37244
PHLPP1	2.48787	3.41404	1.37227
PAG1	5.45994	7.49142	1.37207
ZNF37BP	2.78711	3.8218	1.37124
LINC01116	7.15106	9.80533	1.37117
TMEM8B	1.36181	1.86675	1.37079
ESPL1	4.57955	6.27642	1.37053
PDGFC	24.6935	33.8364	1.37026
CD14	1.03454	1.41757	1.37024
LOC101928485	0.555369	0.760982	1.37023
CKMT2	0.330535	0.452908	1.37023
SHISA2	11.066	15.16	1.36996
DYNC1I1	0.105616	0.144683	1.3699
WWC1	21.1676	28.9952	1.36979
ARHGAP33	1.40492	1.92419	1.36961
C11orf68	44.5968	61.0778	1.36956
JUP	25.5373	34.9643	1.36915
LOC389199	2.32063	3.17616	1.36866
HIST1H1E	263.265	360.306	1.36861
SFXN5	2.35325	3.22014	1.36838
GATSL3	1.77316	2.42588	1.36811
C4orf21	2.09265	2.86237	1.36782
GPR160	1.22982	1.68214	1.36779
STEAP4	0.132136	0.180722	1.3677
SHISA5	44.1415	60.356	1.36733
TFDP1	31.7894	43.4595	1.36711
HEYL	0.154596	0.211338	1.36703
AGPAT5	5.00279	6.83858	1.36695
SLC9A4	0.32007	0.437473	1.3668
RHBDL2	2.82448	3.8605	1.3668
FAM72D	0.526998	0.720301	1.3668
GATA3	1.72898	2.36315	1.36679
SH3TC2	1.9587	2.67675	1.3666
FAM213A	24.1122	32.9457	1.36635
MCM7	54.3323	74.2304	1.36623
CTNNAL1	62.3294	85.1452	1.36605
LIN7B	2.31151	3.15692	1.36574
PHLDA2	80.6475	110.131	1.36558
ALOX5	2.21001	3.01739	1.36533
GLCCI1	1.83458	2.50478	1.36532
BMP4	40.3978	55.1557	1.36531
BLOC1S1,BLOC1S1-RDH5,RDH5	21.2876	29.0536	1.36481
FIGN	2.6567	3.62561	1.3647
ZC3H12B	0.296756	0.404942	1.36456
UROS	19.5244	26.6399	1.36444
ATP8B1	3.6389	4.96472	1.36435
FANCD2	4.60854	6.28749	1.36431
ZNF321P,ZNF816,ZNF816-ZNF321P	2.37439	3.23898	1.36413
INIP	7.80897	10.6517	1.36403
ENO2	51.9232	70.8207	1.36395
MAST4	4.09087	5.57649	1.36316
SSX2IP	5.66452	7.72108	1.36306
ADAMTS12	1.50923	2.05711	1.36302
MTMR7	1.18926	1.62091	1.36296
TFCP2L1	0.990277	1.34943	1.36268
SORCS2	4.54985	6.1985	1.36235
KPNA2	84.5378	115.169	1.36234
NIPAL1	3.92705	5.34973	1.36228
NUP85	30.2359	41.1867	1.36218
HLA-DPA1	10.9216	14.8764	1.36211
CACNB4	0.532914	0.725807	1.36196
MUC6	0.120293	0.163814	1.36179
ROBO4	9.58153	13.0475	1.36173
OTUB2	14.1495	19.2675	1.36171
LOC101929145	2.59135	3.52772	1.36134
MASTL	13.0074	17.7065	1.36126
LOC730102	0.803973	1.0943	1.36112
SEMA6B	2.63239	3.58262	1.36098
VRK1	13.0043	17.6979	1.36093
CCNB2	14.6762	19.9688	1.36062
NEGR1	0.818598	1.1137	1.3605
ANKRD32	2.87301	3.90817	1.36031
ENTPD3	4.8017	6.53103	1.36015
ZNF428	10.9723	14.9223	1.36
MUSK	0.863182	1.17374	1.35978
GLB1L2	0.879862	1.19625	1.35959
SPON1	0.556064	0.755808	1.35921
BRMS1L	4.40206	5.98171	1.35884
PTCH1	2.00458	2.72357	1.35867
TSPAN1	2.58085	3.50622	1.35855
LOC100131496	0.809249	1.09921	1.35831
SH3BGRL2	0.607006	0.824483	1.35828
CENPJ	3.78264	5.13721	1.3581
RNF130	12.4215	16.8695	1.35809
TXNL4B	5.29508	7.19078	1.35801
CSRNP1	6.41394	8.70897	1.35782
SEMA4D	7.31443	9.93001	1.35759
RP3-322G13.5	0.769467	1.04455	1.3575
SIVA1	37.4366	50.8118	1.35728
RANGAP1	40.1832	54.5393	1.35727
SEMA3C	18.1573	24.6421	1.35715
SAA1	193.353	262.356	1.35688
KIF15	4.8516	6.58289	1.35685
NFKBIE	17.6249	23.914	1.35683
RHOF	28.2783	38.3669	1.35676
NTAN1	17.1998	23.3326	1.35656
ID1	4.86834	6.60397	1.35651
PEAK1	3.07341	4.16907	1.3565
TYRO3	4.80268	6.51169	1.35585
KCNAB3	0.389685	0.528349	1.35584
N4BP3	0.124577	0.168905	1.35583
CCND1	107.278	145.45	1.35582
CST7	10.4998	14.2351	1.35575
IL6	138.185	187.316	1.35555
IFNAR2	3.74973	5.08267	1.35548
IGSF8	9.2334	12.5148	1.35538
AP4B1-AS1,DCLRE1B	4.88904	6.62235	1.35453
STAC	4.75063	6.43257	1.35405
SLC2A4	0.244902	0.331545	1.35379
LOC102724235	0.666712	0.902584	1.35378
BIN3-IT1	0.440786	0.596729	1.35378
H2AFZ	163.122	220.803	1.35361
SNORD118,TMEM107	156.793	212.235	1.3536
ECT2	28.3126	38.3204	1.35348
TTC21B	2.13813	2.89373	1.35339
MSRB3	4.32679	5.85578	1.35338
LDHA	642.66	869.71	1.3533
WEE1	10.0565	13.608	1.35315
PDCD1LG2	1.65418	2.23827	1.3531
F3	173.792	235.154	1.35308
MGAT4B	42.9126	58.062	1.35303
SORL1	2.39931	3.24536	1.35262
LRR1	14.1103	19.0824	1.35237
LDLR	102.224	138.235	1.35228
HIST1H2AM	118.462	160.188	1.35223
LOC102724967	12.464	16.8535	1.35217
MYL6	455.735	616.123	1.35193
SEC14L2	5.16314	6.97877	1.35165
LOC102723648	0.302454	0.408686	1.35123
ANKRD13A	17.7316	23.9584	1.35117
MXRA8	8.06063	10.891	1.35114
C19orf67,SAMD1	14.9247	20.1648	1.3511
[truncated: 13,698 more rows]
